# Supplementary material for: Classification of High-Grade Serous Ovarian Cancer Using Tumor Morphologic Characteristics
Source: PubMed Central journal article supplement (PMC9568802; doi:10.1001/jamanetworkopen.2022.36626), 2022-10-14
Supplement: jamanetwopen-e2236626-s001.pdf [file jamanetwopen-e2236626-s001.pdf]

## Supplemental Online Content

Handley KF, Sims TT, Bateman NW, et al. Classification of high-grade serous ovarian cancer using tumor morphologic characteristics. *JAMA Netw Open*. 2022;5(10):e2236626. doi:10.1001/jamanetworkopen.2022.36626

### **eMethods.**

**eTable 1.** Baseline Patient Characteristics

**eTable 2.** Frequency of Surgical Procedures

**eTable 3.** Functional Annotations of Proteins With Higher Expression in Type II Than in Type I Tumors

**eTable 4.** Tentative Attribution of Compounds Identified by SAM as Having Higher Relative Abundances in Primary Type I Than Type II Tumors

**eTable 5.** Tentative Attribution of Compounds Identified by SAM as Having Higher Relative Abundances in Primary Type II Than Type I Tumors

**eTable 6.** Tentative Attribution of Compounds Identified by SAM as Having Higher Relative Abundances in Metastatic Type I Than Type II Tumors

**eTable 7.** Tentative Attribution of Compounds Identified by SAM as Having Higher Relative Abundances in Metastatic Type II Than Type I Tumors

**eFigure 1.** Outline of the Study

**eFigure 2.** NetWalker Analysis of Proteins With Significantly Altered Expression Levels Between Type I and Type II Tumors

**eFigure 3.** Differential mRNA Transcript Expression Analysis of HGSOC Type I and Type II Tumors. Representative Gene Set Enrichment Analysis (GSEA) of RNA Sequencing Results Showing Pathway Changes in Primary (A) and Metastatic (B) Site Samples

**eFigure 4.** Volcano Plots from RNA Sequencing of Patient-Derived (A) Primary and (B) Metastatic High-Grade Serous Ovarian Cancer Samples of Type I vs Type II Morphologic Subtypes

**eFigure 5.** (A) Concordance Between All Genes and Corresponding Proteins Profiled by Both RNA Sequencing-Based Transcriptomics and Quantitative Mass Spectroscopy-Based Proteomics. (B) Correlation of Changes in Differentially Expressed Transcript/Protein Levels Between Type I and Type II Morphologic Subtypes

**eFigure 6.** Immune Population Infiltration in Predominant Type I and Type II Morphologic Subtypes in the (A) Tumor Area and (B) Total Area (Tumor/Non-Tumor)

**eFigure 7.** Representative Desorption Electrospray Ionization Mass Spectra and Ion Images for Metastatic Tissues of Type I and Type II Morphologic Subtypes

## **eReferences**

This supplemental material has been provided by the authors to give readers additional information about their work.

## eMethods

### Patient Selection and Clinical Analysis

This cohort study included patients who presented to MD Anderson with suspected advanced-stage epithelial ovarian cancer, underwent laparoscopic assessment of disease burden prior to treatment between April 1, 2013 and August 5, 2016, and received a histopathologic diagnosis of high-grade serous ovarian cancer (HGSOC). Patients excluded from the study were those who did not meet criteria for laparoscopic assessment of disease burden (e.g., distant metastatic or unresectable disease, co-morbidities precluding primary surgery, poor performance status) according to institutional consensus guidelines<sup>1</sup> as well as those who were not found to have HGSOC on final pathology and those without video recordings available. Patient data and laparoscopic videos were securely stored on the Research Electronic Data Capture software platform<sup>2</sup>. During laparoscopic video review, if both morphologic types were present in the same location, the site was classified as the predominating type. Response to NACT was classified as excellent if there was a complete response on radiologic evaluation according to Response Evaluation Criteria in Solid Tumors (RECIST 1.1), a normalization of CA-125 level ( $\leq 35$  U/mL) in those whose baseline CA-125 level was at least twice the upper limit of normal, and/or a pathologic complete response. Response was classified as poor if there was progressive disease at cycle 1-4, stable disease at cycle 3-4 by RECIST 1.1, and/or suboptimal cytoreduction at interval tumor reductive surgery (iTRS). If a patient met one criteria for poor response and one criteria for excellent response, the patient was considered non-classifiable. All data collection and analysis was performed between April 2020 and November 2021.

### Quantitative mass spectrometry-based Proteomics

Fifty-six frozen primary and metastatic tumor tissues from 32 patients diagnosed with HGSOC were thawed and analyzed by quantitative mass spectrometry (MS)-based proteomics as described previously<sup>3</sup>. Briefly, whole tumor (cancer and stromal cells) samples were harvested by laser microdissection, and samples were subjected to pressure-assisted digestion with trypsin employing a barocycler (2320EXT Pressure BioSciences, Inc). Ten micrograms of total peptide were labeled per tandem mass tag channel (TMTpro 16-plex, Thermo Fisher Scientific). Each multiplex included a reference channel, which was generated by pooling equivalent amounts of peptide digest from each of the 56 cancer specimens. The TMT multiplexes were resolved offline by basic reversed-phase liquid chromatography (1260 Infinity II liquid chromatograph, Agilent) into 24 pooled fractions. The pooled fractions were resuspended in 100 mM  $\text{NH}_4\text{HCO}_3$  and analyzed by liquid chromatography (LC)-tandem MS (LC-MS/MS) employing a nanoflow LC system (EASY-nLC 1200, Thermo Fisher Scientific) coupled online with a Q-Exactive HF-X mass spectrometer (Thermo Fisher Scientific). Peptides were eluted by developing a linear gradient of 2% mobile phase B (95% acetonitrile, 0.1% formic acid) to 32% mobile phase B over 120 min at a constant flow rate of 250 nL/min. The electrospray source capillary voltage and temperature were set at 2.0 kV and 275°C, respectively. High-resolution ( $R=60,000$  at  $m/z$  200) broadband ( $m/z$  400-1600) mass spectra were acquired, followed by selection of the top 12 most intense molecular ions in each MS scan for higher-energy collisional dissociation. Instrument-specific parameters were set as follows: broadband MS: Automatic Gain Control (AGC), 3e6; Radio Frequency Lens, 40%; Maximum Injection Time (IT), 45ms; Charge State, 2-4; Dynamic Exclusion, 10ppm/20 sec; MS2: AGC, 1e5; Maximum IT, 95ms; Resolution, 45k; Quadrupole Isolation, 1.0  $m/z$ ; Isolation Offset, 0.2  $m/z$ ; Normalized Collision Energy, 34; First Mass, 100; Intensity Threshold, 2e5; Tandem Mass Tag Optimization, On. Peptide and global protein-level identifications were generated by searching raw data files with a publicly available, non-redundant human proteome database (Swiss-Prot, <http://www.uniprot.org/>, downloaded 12-01-2017, 20257 entries) using Mascot (v2.6.0, Matrix Science), Proteome Discoverer (v2.2.0.388, Thermo Fisher Scientific), and in-house tools using identical parameters as described previously<sup>3</sup>. Global proteome level data were merged with global data for 47 frozen primary and metastatic tumors collected from 16 patients diagnosed with HGSOC described previously<sup>3</sup> and further classified as exhibiting type I or type II morphologic subtype followed by batch correction using the ComBat function in the R package sva (version 3.34.0).

### Reverse Phase Protein Array (RPPA) and NetWalker Analysis

A total of 46 frozen tissues from 21 patients were prepared and analyzed by MD Anderson's Functional Proteomics RPPA Core Facility as described previously<sup>3</sup>. To validate the findings in patients with uniform morphologic subtype, we compared the median relative protein expression from the remaining patients' biopsy specimens classified as type I with those classified as type II, regardless of classification at the other sites.

### **RNA Sequencing**

Total RNA from 43 frozen tissues from 15 patients was prepared and sequenced as described previously<sup>3</sup>. Total RNA from another 64 frozen tissues from 32 patients were prepared by MD Anderson's Biospecimen Extraction Facility. In brief, RNA was extracted from frozen tissues using the Qiagen RNeasy kit (QIAGEN) according to the manufacturer's instructions. RNA qualification, RNA sequencing library generation, generation of sequencing data, and quality control proceeded as described previously, but with libraries sequenced on a Novaseq 6000 S4 platform<sup>3</sup>. FASTQ files from sequencing were mapped to human genome hg38 using Salmon software version 1.4.0 (<https://combine-lab.github.io/salmon>)<sup>4</sup> to produce raw counts and normalized transcripts per million (TPM) values. All analyses were performed using the R software functions and packages. Batch effects from two sequencing batches were removed using the ComBat function of the R sva package<sup>5</sup>. Differentially expressed genes were obtained using the DESeq2 package on raw counts with additional filtering by removing genes with low expression based on TPM. Tumor purities were estimated using the R ESTIMATE package<sup>6</sup>. GSEA was performed following the instructions from <https://www.gsea-msigdb.org/gsea/index.jsp><sup>7,8</sup>. Pathway enrichment scores are calculated as the average of  $-\log_{10}(\text{NOM } p\text{-value})$  and  $-\log_{10}(\text{FDR } q\text{-value})$  reported by GSEA, which are ceiled at 9 and negatively signed for the control group.

### **Immune-profiling Analysis**

Immune-profiling analysis was performed in tissues from patients with predominant type I morphologic subtype (n = 18, 8 primary and 10 metastatic sites) and patients with predominant type II morphologic subtype (n = 9, 3 primary and 6 metastatic sites) as previously described by Lee, et al<sup>3</sup>. In brief, Opal multiplex staining was performed on a single tissue section from each specimen. Multispectral imaging was utilized to obtain an average of five representative images per sample. Spectral unmixing was performed to separate raw images into individual fluorophores, which were analyzed to identify different cell types. Tumor vs. non-tumor areas in each sample were differentiated with a tissue segmentation algorithm.

### **MS Imaging**

A total of 45 tissue sections were analyzed, of which 25 (14 primary and 11 metastases) were the type I morphologic subtype, and 20 (12 primary and 8 metastases) were the type II subtype. Glass slides containing 8- $\mu\text{m}$ -thick tissue sections were stored in a freezer at  $-80^{\circ}\text{C}$  until use. Prior to desorption electrospray ionization (DESI)-MS analysis, the glass slides were dried for approximately 15 minutes. DESI-MS imaging was conducted as described previously<sup>9</sup>. An Omni Spray 2D Ion Source (Prosolia Inc.) equipped with a lab-built sprayer was coupled with a Q Exactive Focus Hybrid Quadrupole-Orbitrap mass spectrometer (Thermo Fisher Scientific). The analyses were performed in negative ion mode with a spatial resolution of 200  $\mu\text{m}$ . A histologically compatible solvent system, dimethylformamide:acetonitrile (1:1 v/v), was used at a flow rate of 1.2  $\mu\text{L}/\text{min}$ <sup>10</sup>. The  $\text{N}_2$  pressure applied for the DESI sprayer was 185 psi. Mass spectra were collected over  $m/z$  100-1500 with a resolving power of 70,000 at  $m/z$  400. Other optimized instrumental parameters were as follows: spray voltage, 5 kV; capillary temperature,  $300^{\circ}\text{C}$ ; S-lens radiofrequency level, 100; and an average of two micro-scans for each spectrum. The same tissue sections used for DESI-MS imaging were stained with hematoxylin and eosin. A board-certified pathologist with subspecialty certification in gynecologic pathology (JL) performed pathologic evaluation using light microscopy to determine the tumor regions. Light microscopy images of hematoxylin and eosin-stained slides were obtained using the Nano Zoomer imaging system (Hamamatsu, model no. C13140-01).

**eTable 1.** Baseline Patient Characteristics

| Characteristic                      | Predominant Morphologic Subtype |                      |             | Uniform Morphologic Subtype |                     |             |
|-------------------------------------|---------------------------------|----------------------|-------------|-----------------------------|---------------------|-------------|
|                                     | Type I<br>(n=57)                | Type II<br>(n=37)    | p-<br>value | Type I<br>(n=48)            | Type II<br>(n=23)   | p-<br>value |
| Age at diagnosis, years             |                                 |                      | 0.83        |                             |                     | 0.60        |
| Mean (SD)                           | 62.8 (9.0)                      | 63.2 (10.0)          |             | 63.2 (9.1)                  | 61.9 (11.1)         |             |
| Median (range)                      | 62.0<br>(43.0-82.0)             | 64.0<br>(44.0-88.0)  |             | 62.5<br>(43.0-82.0)         | 62.0<br>(44.0-88.0) |             |
| Race*, n (%)                        |                                 |                      | 0.45        |                             |                     | 0.60        |
| American Indian or Alaskan Native   | 0 (0.0)                         | 1 (2.9)              |             | 0 (0.0)                     | 0(0.0)              |             |
| Asian                               | 1 (1.8)                         | 2 (5.7)              |             | 1 (2.1)                     | 1 (4.5)             |             |
| Black or African American           | 6 (10.7)                        | 3 (8.6)              |             | 5 (10.6)                    | 3 (13.6)            |             |
| White or Caucasian                  | 49 (87.5)                       | 29 (82.9)            | 41 (87.2)   | 18 (81.8)                   |                     |             |
| Ethnicity*, n (%)                   |                                 |                      | 0.08        |                             |                     | 0.64        |
| Hispanic or Latino                  | 3 (5.4)                         | 6 (17.1)             |             | 3 (6.4)                     | 2 (9.5)             |             |
| Not Hispanic or Latino              | 53 (94.6)                       | 29 (82.9)            |             | 44 (93.6)                   | 19 (90.5)           |             |
| Preoperative BMI, kg/m <sup>2</sup> |                                 |                      | 0.35        |                             |                     | 0.22        |
| N                                   | 57                              | 37                   |             | 48                          | 23                  |             |
| Mean (SD)                           | 27.1 (6.9)                      | 28.3 (6.7)           |             | 26.9 (6.7)                  | 28.8 (6.8)          |             |
| Median (range)                      | 24.3<br>(18.0-47.2)             | 27.7<br>(17.1-41.7)  |             | 24.4<br>(18.0-47.2)         | 27.7<br>(19.6-41.4) |             |
| Primary disease site, n (%)         |                                 |                      | 0.90        |                             |                     | >0.99       |
| Fallopian tube                      | 2 (3.5)                         | 2 (5.4)              |             | 2 (4.2)                     | 1 (4.3)             |             |
| Ovary                               | 50 (87.7)                       | 32 (86.5)            |             | 42(87.5)                    | 20 (87.0)           |             |
| Peritoneum                          | 5 (8.8)                         | 3 (8.1)              |             | 4 (8.3)                     | 2 (8.7)             |             |
| Stage, n (%)                        |                                 |                      | 0.94        |                             |                     | 0.72        |
| IIB                                 | 1 (1.8)                         | 0 (0.0)              |             | 1 (2.1)                     | 0 (0.0)             |             |
| IIIC                                | 49 (86.0)                       | 31 (83.8)            |             | 41 (85.4)                   | 18 (78.3)           |             |
| IVA                                 | 3 (5.3)                         | 2 (5.4)              |             | 2 (4.2)                     | 2 (8.7)             |             |
| IVB                                 | 4 (7.0)                         | 4 (10.8)             |             | 4 (8.3)                     | 3 (13.0)            |             |
| BRCA mutation status, n (%)         |                                 |                      | 0.84        |                             |                     | 0.98        |
| Patient declined testing            | 4 (8.2)                         | 2 (6.9)              |             | 4 (10.0)                    | 1 (4.8)             |             |
| No mutation                         | 33 (67.4)                       | 21 (72.4)            |             | 27 (67.5)                   | 15 (71.4)           |             |
| BRCA1 mutated                       | 6 (12.2)                        | 4 (13.8)             |             | 5 (12.5)                    | 3 (14.3)            |             |
| BRCA2 mutated                       | 3 (6.1)                         | 2 (6.9)              |             | 3 (7.5)                     | 2 (9.5)             |             |
| VUS                                 | 3 (6.1)                         | 0 (0.0)              |             | 1 (2.5)                     | 0 (0.0)             |             |
| Baseline CA125, U/mL                |                                 |                      | 0.14        |                             |                     | 0.21        |
| N                                   | 56                              | 37                   |             | 48                          | 23                  |             |
| Median (range)                      | 484.5 (11.5-6705.0)             | 620.4 (41.0-12472.0) |             | 453.9 (11.5-6705.0)         | 469.5 (41.0-6882.0) |             |

| Characteristic (continued)                       | Predominant Morphologic Subtype |                     |         | Uniform Morphologic Subtype |                     |         |
|--------------------------------------------------|---------------------------------|---------------------|---------|-----------------------------|---------------------|---------|
|                                                  | Type I (n=57)                   | Type II (n=37)      | p-value | Type I (n=48)               | Type II (n=23)      | p-value |
| Platelets (x10 <sup>3</sup> /mm <sup>3</sup> )   |                                 |                     |         |                             |                     |         |
| N                                                | 56                              | 36                  | 0.88    | 48                          | 22                  | 0.89    |
| Mean (SD)                                        | 386.3 (145.7)                   | 373.9 (126.1)       |         | 386.2 (143.5)               | 381.4 (126.3)       |         |
| Median (range)                                   | 356.0 (144.0-928.0)             | 346.0 (160.0-733.0) |         | 359.5 (167.0-928.0)         | 364.0 (160.0-653.0) |         |
| Hemoglobin (g/dL)                                |                                 |                     |         |                             |                     |         |
| N                                                | 53                              | 36                  | 0.20    | 46                          | 23                  | 0.29    |
| Mean (SD)                                        | 12.3 (1.4)                      | 12.1 (1.2)          |         | 12.2 (1.5)                  | 11.9 (1.3)          |         |
| Median (range)                                   | 12.7 (8.2-14.3)                 | 12.3 (9.6-14.4)     |         | 12.6 (8.2-14.3)             | 12.1 (9.6-13.8)     |         |
| Hematocrit (%)                                   |                                 |                     |         |                             |                     |         |
| N                                                | 53                              | 36                  | 0.33    | 46                          | 23                  | 0.23    |
| Mean (SD)                                        | 37.7 (3.9)                      | 37.2 (3.1)          |         | 37.7 (4.0)                  | 36.8 (3.2)          |         |
| Median (range)                                   | 38.2 (27.2-43.5)                | 37.6 (31.6-43.1)    |         | 38.4 (27.2-43.5)            | 37.5 (31.6-42.9)    |         |
| Leukocytes (x10 <sup>3</sup> /mm <sup>3</sup> )  |                                 |                     |         |                             |                     |         |
| N                                                | 53                              | 36                  | 0.15    | 46                          | 23                  | 0.11    |
| Mean (SD)                                        | 7.9 (2.2)                       | 9.6 (6.2)           |         | 7.7 (2.2)                   | 10.0 (7.5)          |         |
| Median (range)                                   | 7.6 (4.2-14.7)                  | 8.5 (4.0-41.9)      |         | 7.5 (4.2-14.7)              | 8.8 (4.0-41.9)      |         |
| Neutrophils (x10 <sup>3</sup> /mm <sup>3</sup> ) |                                 |                     |         |                             |                     |         |
| N                                                | 53                              | 36                  | 0.36    | 46                          | 23                  | 0.38    |
| Mean (SD)                                        | 5.5 (2.0)                       | 6.1 (2.6)           |         | 5.4 (2.0)                   | 6.0 (2.6)           |         |
| Median (range)                                   | 5.5 (1.2-12.3)                  | 5.8 (1.8-13.8)      |         | 5.4 (1.2-12.3)              | 6.3 (1.8-10.7)      |         |
| Creatinine (mg/dL)                               |                                 |                     |         |                             |                     |         |
| N                                                | 52                              | 36                  | 0.12    | 46                          | 23                  | 0.21    |
| Mean (SD)                                        | 0.8 (0.2)                       | 0.8 (0.2)           |         | 0.8 (0.2)                   | 0.8 (0.2)           |         |
| Median (range)                                   | 0.8 (0.5-1.4)                   | 0.7 (0.4-1.2)       |         | 0.8 (0.5-1.4)               | 0.7 (0.4-1.2)       |         |
| Albumin (g/dL)                                   |                                 |                     |         |                             |                     |         |
| N                                                | 43                              | 29                  | 0.25    | 37                          | 18                  | 0.33    |
| Mean (SD)                                        | 4.0 (0.5)                       | 3.8 (0.6)           |         | 4.0 (0.5)                   | 3.8 (0.6)           |         |
| Median (range)                                   | 3.9 (2.5-5.0)                   | 3.9 (2.5-4.8)       |         | 4.0 (2.5-5.0)               | 3.9 (2.5-4.6)       |         |
| ECOG Performance Status, n (%)                   |                                 |                     |         |                             |                     |         |
| 0                                                | 32 (57.1)                       | 15 (40.5)           | 0.30    | 25 (53.2)                   | 11 (47.8)           | 0.58    |
| 1                                                | 20 (35.7)                       | 18 (48.7)           |         | 18 (38.3)                   | 8 (34.8)            |         |
| 2                                                | 4 (7.1)                         | 4 (10.8)            |         | 4 (8.5)                     | 4 (17.4)            |         |
| ASA physical status class, n (%)                 |                                 |                     |         |                             |                     |         |
| II                                               | 11 (19.6)                       | 5 (13.9)            | 0.09    | 9 (19.2)                    | 2 (9.1)             | 0.26    |
| III                                              | 45 (80.4)                       | 28 (77.8)           |         | 38 (80.9)                   | 19 (86.4)           |         |
| IV                                               | 0 (0.0)                         | 3 (8.3)             |         | 0 (0.0)                     | 1 (4.5)             |         |

| Characteristic<br>(continued)        | Predominant Morphologic Subtype |                   |             | Uniform Morphologic Subtype |                    |             |
|--------------------------------------|---------------------------------|-------------------|-------------|-----------------------------|--------------------|-------------|
|                                      | Type I<br>(n=57)                | Type II<br>(n=37) | p-<br>value | Type I<br>(n=48)            | Type II<br>(n=23)  | p-<br>value |
| Charlson Comorbidity<br>Index, n (%) |                                 |                   | 0.38        |                             |                    | 0.91        |
| N                                    | 57                              | 37                |             | 48                          | 23                 |             |
| Mean (SD)                            | 3.2 (1.7)                       | 3.7 (2.4)         |             | 3.3 (1.7)                   | 3.6 (2.6)          |             |
| Median (range)                       | 3.0 (1.0-11.0)                  | 3.0 (1.0-14.0)    |             | 3.0 (1.0-<br>11.0)          | 3.0 (1.0-<br>14.0) |             |
| Employment status*,<br>n (%)         |                                 |                   | 0.06        |                             |                    | 0.23        |
| Unemployed                           | 29 (50.9%)                      | 11 (29.7%)        |             | 24 (50.0%)                  | 8 (34.8%)          |             |
| Employed part-<br>time               | 1 (1.8%)                        | 0 (0.0%)          |             | 1 (2.1%)                    | 0 (0.0%)           |             |
| Employed full-time                   | 14 (24.6%)                      | 9 (24.3%)         |             | 13 (27.1%)                  | 5 (21.7%)          |             |
| Unknown                              | 13 (22.8%)                      | 17 (46.0%)        |             | 10 (20.8%)                  | 10 (43.5%)         |             |

\*Patient reported

Abbreviations: BMI, body mass index; VUS, variant of unknown significance; ECOG, Eastern Cooperative Oncology Group; ASA, American Society of Anesthesiologists

**eTable 2.** Frequency of Surgical Procedures

| Procedure                       | Predominant Morphologic Subtype |                         |         | Uniform Morphologic Subtype |                         |         |
|---------------------------------|---------------------------------|-------------------------|---------|-----------------------------|-------------------------|---------|
|                                 | Type 1<br>(n=57), n (%)         | Type 2<br>(n=37), n (%) | p-value | Type 1<br>(n=48), n (%)     | Type 2<br>(n=23), n (%) | p-value |
| Hysterectomy                    |                                 |                         | 0.79    |                             |                         | 0.51    |
| Not performed                   | 14 (25)                         | 10 (27)                 |         | 14 (29)                     | 5 (22)                  |         |
| Performed                       | 43 (75)                         | 27 (73)                 |         | 34 (71)                     | 18 (78)                 |         |
| Salpingo-oophorectomy           |                                 |                         | 0.94    |                             |                         | 0.79    |
| Not performed                   | 5 (9)                           | 2 (5)                   |         | 5 (10)                      | 1 (4)                   |         |
| BSO                             | 49 (86)                         | 33 (89)                 |         | 41 (85)                     | 21 (91)                 |         |
| RSO                             | 2 (4)                           | 1 (3)                   |         | 1 (2)                       | 0 (0)                   |         |
| LSO                             | 1 (2)                           | 1 (3)                   |         | 1 (2)                       | 1 (4)                   |         |
| Omentectomy                     |                                 |                         | 0.74    |                             |                         | >0.99   |
| Not performed                   | 5 (9)                           | 4 (11)                  |         | 5 (10)                      | 2 (9)                   |         |
| Performed                       | 52 (91)                         | 33 (89)                 |         | 43 (90)                     | 21 (91)                 |         |
| Argon beam coagulation          |                                 |                         | 0.33    |                             |                         | 0.18    |
| Not performed                   | 32 (56)                         | 17 (46)                 |         | 29 (60)                     | 10 (43)                 |         |
| Performed                       | 25 (44)                         | 20 (54)                 |         | 19 (40)                     | 13 (57)                 |         |
| Diaphragm procedures            |                                 |                         | 0.33    |                             |                         | 0.82    |
| Not performed                   | 45 (79)                         | 28 (76)                 |         | 38 (79)                     | 17 (74)                 |         |
| Stripping                       | 8 (14)                          | 3 (8)                   |         | 6 (13)                      | 3 (13)                  |         |
| Resection                       | 4 (7)                           | 6 (16)                  |         | 4 (8)                       | 3 (13)                  |         |
| Modified posterior exenteration |                                 |                         | 0.006   |                             |                         | 0.01    |
| Not performed                   | 56 (98)                         | 30 (81)                 |         | 47 (98)                     | 18 (78)                 |         |
| Performed                       | 1 (2)                           | 7 (19)                  |         | 1 (2)                       | 5 (22)                  |         |
| Liver resection                 |                                 |                         | 0.18    |                             |                         | 0.20    |
| Not performed                   | 53 (93)                         | 31 (84)                 |         | 45 (94)                     | 19 (83)                 |         |
| Performed                       | 4 (7)                           | 6 (16)                  |         | 3 (6)                       | 4 (17)                  |         |
| Peritoneal stripping            |                                 |                         | 0.13    |                             |                         | 0.02    |
| Not performed                   | 45 (79)                         | 24 (65)                 |         | 38 (79)                     | 12 (52)                 |         |
| Performed                       | 12 (21)                         | 13 (35)                 |         | 10 (21)                     | 11 (48)                 |         |
| Splenectomy                     |                                 |                         | 0.66    |                             |                         | >0.99   |
| Not performed                   | 51 (89)                         | 32 (86)                 |         | 42 (88)                     | 20 (87)                 |         |
| Performed                       | 6 (11)                          | 5 (14)                  |         | 6 (13)                      | 3 (13)                  |         |
| Bladder resection               |                                 |                         | >0.99   |                             |                         | >0.99   |
| Not performed                   | 56 (98)                         | 37 (100)                |         | 47 (47)                     | 23 (100)                |         |
| Performed                       | 1 (2)                           | 0 (0)                   |         | 1 (2)                       | 0 (0)                   |         |



| Procedure<br>(continued)          | Predominant Morphologic Subtype |                         |             | Uniform Morphologic Subtype |                         |             |
|-----------------------------------|---------------------------------|-------------------------|-------------|-----------------------------|-------------------------|-------------|
|                                   | Type 1<br>(n=57), n (%)         | Type 2<br>(n=37), n (%) | p-<br>value | Type 1<br>(n=48), n (%)     | Type 2<br>(n=23), n (%) | p-<br>value |
| Pelvic LND                        |                                 |                         |             |                             |                         |             |
| Not performed                     | 53 (93)                         | 35 (95)                 | >0.99       | 45 (94)                     | 22 (96)                 | >0.99       |
| Performed                         | 4 (7)                           | 2 (5)                   |             | 3 (6)                       | 1 (4)                   |             |
| Para-aortic LND                   |                                 |                         |             |                             |                         |             |
| Not performed                     | 53 (93)                         | 34 (92)                 | >0.99       | 44 (92)                     | 21 (91)                 | >0.99       |
| Performed                         | 4 (7)                           | 3 (8)                   |             | 4 (8)                       | 2 (9)                   |             |
| Appendectomy                      |                                 |                         |             |                             |                         |             |
| Not performed                     | 39 (68)                         | 29 (78)                 | 0.29        | 31 (65)                     | 17 (74)                 | 0.43        |
| Performed                         | 18 (32)                         | 8 (22)                  |             | 17 (35)                     | 6 (26)                  |             |
| End colostomy                     |                                 |                         |             |                             |                         |             |
| Not performed                     | 55 (96)                         | 33 (89)                 | 0.21        | 46 (96)                     | 19 (83)                 | 0.08        |
| Performed                         | 2 (4)                           | 4 (11)                  |             | 2 (4)                       | 4 (17)                  |             |
| Ileo-ascending resection          |                                 |                         |             |                             |                         |             |
| Not performed                     | 55 (96)                         | 35 (95)                 | 0.65        | 46 (96)                     | 22 (96)                 | >0.99       |
| Performed                         | 2 (4)                           | 2 (5)                   |             | 2 (4)                       | 1 (4)                   |             |
| Loop ileostomy                    |                                 |                         |             |                             |                         |             |
| Not performed                     | 55 (96)                         | 33 (89)                 | 0.21        | 46 (96)                     | 22 (96)                 | >0.99       |
| Performed                         | 2 (4)                           | 4 (11)                  |             | 2 (4)                       | 1 (4)                   |             |
| Rectosigmoid resection            |                                 |                         |             |                             |                         |             |
| Not performed                     | 45 (79)                         | 27 (73)                 | 0.50        | 38 (79)                     | 17 (74)                 | 0.62        |
| Performed                         | 12 (21)                         | 10 (27)                 |             | 10 (21)                     | 6 (26)                  |             |
| Small bowel resection             |                                 |                         |             |                             |                         |             |
| Not performed                     | 56 (98)                         | 31 (84)                 | 0.01        | 47 (98)                     | 18 (78)                 | 0.01        |
| Performed                         | 1 (2)                           | 6 (16)                  |             | 1 (2)                       | 5 (22)                  |             |
| Resection of port site metastasis |                                 |                         |             |                             |                         |             |
| Not performed                     | 53 (93)                         | 37 (100)                | 0.15        | 44 (92)                     | 23 (100)                | 0.30        |
| Performed                         | 4 (7)                           | 0 (0)                   |             | 4 (8)                       | 0 (0)                   |             |

Abbreviations: BSO, bilateral salpingo-oophorectomy; RSO, right salpingo-oophorectomy; LSO, left salpingo-oophorectomy; LND, lymph node dissection

**eTable 3.** Functional Annotations of Proteins With Higher Expression in Type II Than in Type I Tumors

| Annotation ID | Functional Annotation                         | Ontology           | Tree Level | Number of Occurrences | Fraction of Nodes | Hyper-geometric p-value | Genes                     |
|---------------|-----------------------------------------------|--------------------|------------|-----------------------|-------------------|-------------------------|---------------------------|
| Bs119304      | Progesterone-mediated oocyte maturation       | Pathway            | 10         | 3                     | 0.23              | 3.84E-08                | <i>BRAF, PLK1, CCNB1</i>  |
| Bs486750      | Condensed nuclear chromosome                  | Structural complex | 10         | 3                     | 0.23              | 8.28E-09                | <i>BRD4, PLK1, CCNB1</i>  |
| Bs486751      | Condensed chromosome                          | Structural complex | 10         | 3                     | 0.23              | 3.24E-07                | <i>BRD4, PLK1, CCNB1</i>  |
| Bs508122      | Positive regulation of cell cycle             | Pathway            | 10         | 3                     | 0.23              | 6.51E-08                | <i>BRD4, PLK1, CCNB1</i>  |
| Bs137935      | FOXM1 transcription network                   | Pathway            | 10         | 3                     | 0.23              | 1.50E-09                | <i>ESR1, PLK1, CCNB1</i>  |
| Bs487083      | Nuclear chromatin                             | Structural complex | 10         | 3                     | 0.23              | 2.90E-07                | <i>BRD4, MUC1, ARID1A</i> |
| Bs494702      | Positive regulation of organelle organization | Pathway            | 10         | 3                     | 0.23              | 5.81E-07                | <i>MUC1, PLK1, CCNB1</i>  |
| Bs503         | Progesterone-mediated oocyte maturation       | Pathway            | 10         | 3                     | 0.23              | 3.84E-08                | <i>BRAF, PLK1, CCNB1</i>  |
| Bs510652      | Developmental growth                          | Pathway            | 10         | 3                     | 0.23              | 8.52E-07                | <i>ESR1, BRD4, CNB1</i>   |
| Bs198811      | Cell cycle                                    | Pathway            | 10         | 3                     | 0.23              | 4.82E-08                | <i>CDH1, PLK1, CCNB1</i>  |
| Bs198862      | T cell receptor signaling pathway             | Pathway            | 10         | 3                     | 0.23              | 2.29E-07                | <i>BRAF, MUC1, GAB2</i>   |
| Bs518208      | Positive regulation of cell cycle process     | Pathway            | 10         | 3                     | 0.23              | 3.24E-07                | <i>BRD4, MUC1, PLK1</i>   |

**eTable 4.** Tentative Attribution of Compounds Identified by SAM as Having Higher Relative Abundances in Primary Type I Than Type II Tumors

| Tentative attribution  | Molecular formula                                            | Detected <i>m/z</i> | Mass error, ppm | SAM score |
|------------------------|--------------------------------------------------------------|---------------------|-----------------|-----------|
| FA 8:0                 | C <sub>8</sub> H <sub>15</sub> O <sub>2</sub>                | 143.1079            | 1.0             | -22.738   |
| FA 12:0                | C <sub>12</sub> H <sub>23</sub> O <sub>2</sub>               | 199.1701            | -1.3            | -17.936   |
| FA 9:0                 | C <sub>9</sub> H <sub>17</sub> O <sub>2</sub>                | 157.1227            | -4.5            | -17.575   |
| FA 15:4                | C <sub>15</sub> H <sub>21</sub> O <sub>2</sub>               | 233.1547            | 0.0             | -16.972   |
| FA 18:0                | C <sub>18</sub> H <sub>35</sub> O <sub>2</sub>               | 283.2648            | 1.9             | -13.502   |
| FA 10:0                | C <sub>10</sub> H <sub>19</sub> O <sub>2</sub>               | 171.1385            | -3.2            | -12.432   |
| PS 34:1                | C <sub>40</sub> H <sub>75</sub> NO <sub>10</sub> P           | 760.5149            | 2.0             | -12.111   |
| Uridine*               | C <sub>9</sub> H <sub>11</sub> N <sub>2</sub> O <sub>6</sub> | 243.0624            | 0.6             | -11.371   |
| PC 34:2                | C <sub>42</sub> H <sub>80</sub> NO <sub>8</sub> PCl          | 792.5314            | -0.2            | -10.724   |
| Not identified         | -                                                            | 333.0946            | -               | -10.722   |
| Not identified         | -                                                            | 188.0729            | -               | -10.208   |
| Not identified         | -                                                            | 146.9650            | -               | -10.101   |
| FA 20:4                | C <sub>20</sub> H <sub>31</sub> O <sub>2</sub>               | 303.2333            | 1.1             | -10.018   |
| Cer d42:1              | C <sub>42</sub> H <sub>83</sub> NO <sub>3</sub> Cl           | 684.6072            | 0.7             | -9.940    |
| Not identified         | -                                                            | 186.0492            | -               | -9.631    |
| FA 16:0                | C <sub>16</sub> H <sub>31</sub> O <sub>2</sub>               | 255.2333            | 1.4             | -9.582    |
| LacCer d18:0/26:0*     | C <sub>56</sub> H <sub>108</sub> NO <sub>13</sub>            | 1002.7896           | 7.0             | -8.971    |
| Not identified         | -                                                            | 114.9351            | -               | -8.967    |
| Not identified         | -                                                            | 368.9771            | -               | -8.725    |
| FA 14:0                | C <sub>14</sub> H <sub>27</sub> O <sub>2</sub>               | 227.2014            | -1.1            | -8.564    |
| PE 34:2                | C <sub>39</sub> H <sub>73</sub> NO <sub>8</sub> P            | 714.5109            | 4.2             | -8.105    |
| PE 44:11*              | C <sub>49</sub> H <sub>75</sub> NO <sub>8</sub> P            | 836.5314            | 9.4             | -7.836    |
| PG 32:0                | C <sub>38</sub> H <sub>75</sub> O <sub>10</sub> P            | 721.5026            | 0.1             | -7.787    |
| PE O-34:3 or PE P-34:2 | C <sub>39</sub> H <sub>73</sub> NO <sub>7</sub> P            | 698.5133            | 0.4             | -7.530    |
| PA 24:2                | C <sub>37</sub> H <sub>68</sub> O <sub>8</sub> P             | 671.4676            | 2.8             | -7.408    |
| PI 32:0                | C <sub>41</sub> H <sub>78</sub> O <sub>13</sub> P            | 809.5214            | 3.5             | -7.268    |
| PE 34:1                | C <sub>39</sub> H <sub>75</sub> NO <sub>8</sub> P            | 716.5248            | 1.7             | -7.100    |
| PE 36:3                | C <sub>41</sub> H <sub>75</sub> NO <sub>8</sub> P            | 740.5232            | -0.5            | -6.999    |
| PI 38:2                | C <sub>47</sub> H <sub>86</sub> O <sub>13</sub> P            | 889.5768            | -4.9            | -6.716    |
| PI 36:1                | C <sub>45</sub> H <sub>84</sub> O <sub>13</sub> P            | 863.5643            | -1.4            | -6.361    |
| Not identified         | -                                                            | 191.0726            | -               | -6.283    |
| Not identified         | -                                                            | 126.9040            | -               | -6.260    |
| LysoPI 18:0            | C <sub>27</sub> H <sub>52</sub> O <sub>12</sub> P            | 599.3215            | 2.2             | -6.182    |
| FA 22:0                | C <sub>22</sub> H <sub>43</sub> O <sub>2</sub>               | 339.3269            | 0.1             | -6.091    |
| Cer d38:1              | C <sub>40</sub> H <sub>79</sub> NO <sub>3</sub> Cl           | 656.5768            | 2.1             | -6.039    |
| Not identified         | -                                                            | 116.9334            | -               | -5.957    |
| PA 36:4                | C <sub>39</sub> H <sub>68</sub> O <sub>8</sub> P             | 695.4690            | 4.7             | -5.810    |
| PA 32:0                | C <sub>35</sub> H <sub>68</sub> O <sub>8</sub> P             | 647.4686            | 4.4             | -5.691    |

| Tentative attribution (continued) | Molecular formula                                                | Detected m/z | Mass error, ppm | SAM score |
|-----------------------------------|------------------------------------------------------------------|--------------|-----------------|-----------|
| CL 72:4                           | C <sub>81</sub> H <sub>148</sub> O <sub>17</sub> P <sub>2</sub>  | 727.5077     | -3.3            | -5.405    |
| PE 36:1                           | C <sub>41</sub> H <sub>79</sub> NO <sub>8</sub> P                | 744.5533     | -2.1            | -5.399    |
| Not identified                    | -                                                                | 348.1582     | -               | -5.144    |
| FA 13:8                           | C <sub>13</sub> H <sub>9</sub> O <sub>2</sub>                    | 197.0605     | -1.5            | -5.124    |
| FA 20:0                           | C <sub>20</sub> H <sub>39</sub> O <sub>2</sub>                   | 311.2956     | 0.1             | -5.089    |
| DG 38:4/0:0                       | C <sub>41</sub> H <sub>72</sub> O <sub>5</sub> Cl                | 679.5090     | 2.4             | -4.971    |
| FA 20:5                           | C <sub>20</sub> H <sub>29</sub> O <sub>2</sub>                   | 301.2174     | 0.3             | -4.914    |
| PI 36:1                           | C <sub>45</sub> H <sub>84</sub> O <sub>13</sub> P                | 863.5679     | 2.8             | -4.885    |
| PE 36:2                           | C <sub>41</sub> H <sub>77</sub> NO <sub>8</sub> P                | 742.5407     | 2.0             | -4.694    |
| Cer d18:16:0                      | C <sub>34</sub> H <sub>69</sub> NO <sub>3</sub> Cl               | 574.4982     | 1.8             | -4.679    |
| PE 39:5                           | C <sub>44</sub> H <sub>77</sub> NO <sub>8</sub> P                | 778.5414     | 2.8             | -4.598    |
| Mannitol*                         | C <sub>6</sub> H <sub>13</sub> O <sub>6</sub>                    | 181.0710     | -4.2            | -4.425    |
| Not identified                    | -                                                                | 356.2645     | -               | -4.314    |
| 2-Dodecylbenzenesulfonic acid*    | C <sub>18</sub> H <sub>29</sub> O <sub>3</sub> S                 | 325.1852     | 2.8             | -4.265    |
| Not identified                    | -                                                                | 412.9677     | -               | -4.256    |
| CL 74:10                          | C <sub>83</sub> H <sub>140</sub> O <sub>17</sub> P <sub>2</sub>  | 735.4814     | 3.5             | -4.159    |
| PI 34:2                           | C <sub>43</sub> H <sub>78</sub> O <sub>13</sub> P                | 833.5211     | 3.1             | -4.158    |
| CL 72:6                           | C <sub>81</sub> H <sub>144</sub> O <sub>17</sub> P <sub>2</sub>  | 725.4940     | -0.7            | -4.103    |
| PE O-40:6*                        | C <sub>45</sub> H <sub>79</sub> NO <sub>7</sub> P                | 776.5604     | 0.6             | -4.061    |
| PE 18:1/1:0                       | C <sub>24</sub> H <sub>45</sub> NO <sub>8</sub> P                | 506.2899     | 2.1             | -3.995    |
| Cer m42:1                         | C <sub>42</sub> H <sub>83</sub> NO <sub>2</sub> Cl               | 668.6140     | 3.3             | -3.987    |
| PG 22:1                           | C <sub>38</sub> H <sub>72</sub> O <sub>10</sub> P                | 719.4879     | 1.4             | -3.970    |
| PE 38:3                           | C <sub>43</sub> H <sub>79</sub> NO <sub>8</sub> P                | 768.5546     | -0.4            | -3.842    |
| Not identified                    | -                                                                | 160.9109     | -               | -3.720    |
| Not identified                    | -                                                                | 158.9109     | -               | -3.693    |
| Not identified                    | -                                                                | 265.1472     | -               | -3.632    |
| PG 36:2                           | C <sub>42</sub> H <sub>78</sub> O <sub>10</sub> P                | 773.5358     | 2.6             | -3.578    |
| PC 36:2                           | C <sub>44</sub> H <sub>84</sub> NO <sub>8</sub> PCl              | 820.5603     | -3.1            | -3.527    |
| Benzoic acid                      | C <sub>7</sub> H <sub>5</sub> O <sub>2</sub>                     | 121.0290     | -4.2            | -3.509    |
| FA 11:0                           | C <sub>11</sub> H <sub>21</sub> O <sub>2</sub>                   | 185.1541     | -3.3            | -3.416    |
| Glutamic acid                     | C <sub>5</sub> H <sub>8</sub> NO <sub>4</sub>                    | 146.0449     | -6.7            | -3.413    |
| PE 38:5                           | C <sub>43</sub> H <sub>75</sub> NO <sub>8</sub> P                | 764.5244     | 1.1             | -3.277    |
| PI 38:6                           | C <sub>47</sub> H <sub>78</sub> O <sub>13</sub> P                | 881.5209     | 2.7             | -3.208    |
| PA 36:3                           | C <sub>39</sub> H <sub>70</sub> O <sub>8</sub> P                 | 697.4815     | 0.2             | -3.140    |
| N-Undecanoylglycine*              | C <sub>13</sub> H <sub>24</sub> NO <sub>3</sub>                  | 242.1764     | 1.0             | -3.116    |
| Prolyl-Glutamine*                 | C <sub>10</sub> H <sub>17</sub> N <sub>3</sub> O <sub>4</sub> Cl | 278.0929     | 5.7             | -2.960    |
| Not identified                    | -                                                                | 698.9738     | -               | -2.929    |
| PS 36:2                           | C <sub>42</sub> H <sub>77</sub> NO <sub>10</sub> P               | 786.5322     | 4.0             | -2.902    |
| PE O-34:2 or PE P-34:1            | C <sub>39</sub> H <sub>75</sub> NO <sub>7</sub> P                | 700.5309     | 3.2             | -2.834    |
| PI 38:5                           | C <sub>47</sub> H <sub>80</sub> O <sub>13</sub> P                | 883.5338     | -0.5            | -2.744    |
| Cer d18:1/20:0*                   | C <sub>38</sub> H <sub>75</sub> NO <sub>3</sub> Cl               | 628.5462     | 3.3             | -2.737    |

| Tentative attribution (continued) | Molecular formula                                               | Detected m/z | Mass error, ppm | SAM score |
|-----------------------------------|-----------------------------------------------------------------|--------------|-----------------|-----------|
| PG dO-40:9*                       | C <sub>46</sub> H <sub>76</sub> O <sub>8</sub> P                | 787.5334     | 6.4             | -2.734    |
| MG 20:4*                          | C <sub>23</sub> H <sub>38</sub> O <sub>4</sub> Cl               | 413.2465     | 0.2             | -2.679    |
| Glucose                           | C <sub>6</sub> H <sub>12</sub> O <sub>6</sub> Cl                | 215.0327     | -0.4            | -2.655    |
| PE O-38:5                         | C <sub>43</sub> H <sub>77</sub> NO <sub>7</sub> P               | 750.5443     | 0.0             | -2.643    |
| PS O-36:2 or PS P-36:1            | C <sub>42</sub> H <sub>79</sub> NO <sub>9</sub> P               | 772.5517     | 2.5             | -2.623    |
| 3-Hydroxypicolinic acid           | C <sub>6</sub> H <sub>4</sub> NO <sub>3</sub>                   | 138.0188     | -6.3            | -2.539    |
| Not identified                    | -                                                               | 123.9012     | -               | -2.531    |
| Cer d18:2/28:0*                   | C <sub>46</sub> H <sub>89</sub> NO <sub>3</sub> Cl              | 738.6605     | 9.3             | -2.483    |
| Methymycin                        | C <sub>25</sub> H <sub>43</sub> NO <sub>7</sub> Cl              | 504.2725     | -1.7            | -2.465    |
| PE O-36:2*                        | C <sub>41</sub> H <sub>79</sub> NO <sub>7</sub> P               | 728.5631     | 4.3             | -2.456    |
| Valerenolic acid                  | C <sub>15</sub> H <sub>21</sub> O <sub>3</sub>                  | 249.1494     | -0.9            | -2.431    |
| FA 24:1                           | C <sub>24</sub> H <sub>45</sub> O <sub>2</sub>                  | 365.3427     | 0.5             | -2.411    |
| PG 36:4                           | C <sub>42</sub> H <sub>74</sub> O <sub>10</sub> P               | 769.5059     | 4.4             | -2.402    |
| Not identified                    | -                                                               | 130.9303     | -               | -2.390    |
| CL 68:5                           | C <sub>77</sub> H <sub>138</sub> O <sub>17</sub> P <sub>2</sub> | 698.4730     | 2.8             | -2.327    |
| PG 40:8                           | C <sub>46</sub> H <sub>74</sub> O <sub>10</sub> P               | 817.5011     | 1.7             | -2.278    |
| FA 10:6;O*                        | C <sub>10</sub> H <sub>7</sub> O <sub>3</sub>                   | 175.0409     | 4.8             | -2.193    |
| CL 70:4                           | C <sub>79</sub> H <sub>144</sub> O <sub>17</sub> P <sub>2</sub> | 713.4935     | -1.4            | -2.106    |
| FA 24:0                           | C <sub>24</sub> H <sub>47</sub> O <sub>2</sub>                  | 367.3586     | 1.2             | -2.084    |
| PS 38:3                           | C <sub>44</sub> H <sub>79</sub> NO <sub>10</sub> P              | 812.5447     | 0.0             | -2.081    |
| FAHFA 36:1;O*                     | C <sub>36</sub> H <sub>69</sub> O <sub>4</sub>                  | 565.5208     | 1.2             | -2.078    |
| Not identified                    | -                                                               | 910.5576     | -               | -2.033    |
| PE 39:1                           | C <sub>44</sub> H <sub>86</sub> NO <sub>8</sub> PCI             | 822.5730     | -6.7            | -2.015    |
| FA 17:0                           | C <sub>17</sub> H <sub>33</sub> O <sub>2</sub>                  | 269.2489     | 1.1             | -1.985    |
| Cer d40:2                         | C <sub>40</sub> H <sub>77</sub> NO <sub>3</sub> Cl              | 654.5615     | 2.7             | -1.984    |
| FA 12:2                           | C <sub>12</sub> H <sub>19</sub> O <sub>2</sub>                  | 195.1387     | -1.8            | -1.955    |
| PG 38:5                           | C <sub>44</sub> H <sub>76</sub> O <sub>10</sub> P               | 795.5153     | -3.6            | -1.921    |
| FA 22:1                           | C <sub>22</sub> H <sub>41</sub> O <sub>2</sub>                  | 337.3115     | 0.9             | -1.917    |
| PG 38:6                           | C <sub>44</sub> H <sub>74</sub> O <sub>10</sub> P               | 793.5020     | -0.6            | -1.900    |
| PS P-36:2 or PS O-36:3            | C <sub>42</sub> H <sub>77</sub> NO <sub>9</sub> P               | 770.5349     | 1.0             | -1.895    |
| PS 42:6*                          | C <sub>48</sub> H <sub>82</sub> O <sub>10</sub> NP              | 862.5556     | -5.5            | -1.811    |
| CL 78:6*                          | C <sub>87</sub> H <sub>156</sub> O <sub>17</sub> P <sub>2</sub> | 767.5438     | 3.1             | -1.803    |
| PE O-36:3 or P-36:2               | C <sub>41</sub> H <sub>77</sub> NO <sub>7</sub> P               | 726.5459     | 2.2             | -1.745    |
| Gluconic acid                     | C <sub>6</sub> H <sub>11</sub> O <sub>7</sub>                   | 195.0505     | -2.7            | -1.657    |
| Histidine*                        | C <sub>6</sub> H <sub>8</sub> N <sub>3</sub> O <sub>2</sub>     | 154.0613     | -5.8            | -1.641    |
| PS 42:2                           | C <sub>48</sub> H <sub>89</sub> O <sub>10</sub> NP              | 870.6248     | 2.1             | -1.619    |
| PE 39:3*                          | C <sub>44</sub> H <sub>82</sub> NO <sub>8</sub> PCI             | 818.5497     | 3.0             | -1.611    |
| PI 25:1                           | C <sub>44</sub> H <sub>82</sub> O <sub>13</sub> P               | 849.5519     | -2.4            | -1.579    |
| PE 41:6*                          | C <sub>46</sub> H <sub>79</sub> NO <sub>8</sub> P               | 804.5570     | 2.6             | -1.397    |
| PA 24:1                           | C <sub>37</sub> H <sub>70</sub> O <sub>8</sub> P                | 673.4832     | 2.7             | -1.365    |
| PI O-23:0                         | C <sub>42</sub> H <sub>83</sub> O <sub>12</sub> PCI             | 845.5325     | 1.0             | -1.360    |

| Tentative attribution (continued) | Molecular formula                                   | Detected m/z | Mass error, ppm | SAM score |
|-----------------------------------|-----------------------------------------------------|--------------|-----------------|-----------|
| PS 36:3                           | C <sub>42</sub> H <sub>75</sub> NO <sub>10</sub> P  | 784.5139     | 0.6             | -1.299    |
| PE 0:0/20:4;O2*                   | C <sub>25</sub> H <sub>43</sub> NO <sub>9</sub> P   | 532.2698     | 3.2             | -1.252    |
| PE 39:4*                          | C <sub>44</sub> H <sub>80</sub> NO <sub>8</sub> PCI | 816.5395     | 9.7             | -1.248    |
| MG 20:0                           | C <sub>23</sub> H <sub>46</sub> O <sub>4</sub> Cl   | 421.3103     | 3.1             | -1.245    |
| PG 40:7                           | C <sub>46</sub> H <sub>76</sub> O <sub>10</sub> P   | 819.5203     | 2.6             | -1.229    |
| Not identified                    | -                                                   | 369.9810     | -               | -1.166    |
| PG 40:5                           | C <sub>46</sub> H <sub>80</sub> O <sub>10</sub> P   | 823.5496     | 0.2             | -1.110    |
| Not identified                    | -                                                   | 421.3319     | -               | -1.084    |
| PE O-36:4*                        | C <sub>41</sub> H <sub>75</sub> NO <sub>7</sub> P   | 724.5296     | 1.3             | -1.064    |
| PS 37:2*                          | C <sub>43</sub> H <sub>79</sub> NO <sub>10</sub> P  | 800.5501     | 6.7             | -1.061    |
| PI 36:3                           | C <sub>45</sub> H <sub>80</sub> O <sub>13</sub> P   | 859.5347     | 0.6             | -1.059    |
| Not identified                    | -                                                   | 614.3848     | -               | -1.055    |
| PI 40:5                           | C <sub>49</sub> H <sub>84</sub> O <sub>13</sub> P   | 911.5638     | -1.9            | -1.046    |
| PI 36:3*                          | C <sub>45</sub> H <sub>81</sub> O <sub>13</sub> P   | 859.5352     | 1.2             | -0.931    |
| DG 34:2/0:0                       | C <sub>37</sub> H <sub>68</sub> O <sub>5</sub> Cl   | 627.4758     | -0.4            | -0.875    |
| Cer d34:2                         | C <sub>34</sub> H <sub>65</sub> NO <sub>3</sub> Cl  | 570.4672     | 2.4             | -0.868    |
| PI O-32:0*                        | C <sub>41</sub> H <sub>80</sub> O <sub>12</sub> P   | 795.5396     | 0.4             | -0.851    |
| PE O-40:5 or PE P-40:4            | C <sub>45</sub> H <sub>81</sub> NO <sub>7</sub> P   | 778.5781     | 3.2             | -0.838    |
| PS O-38:4 or P-38:3               | C <sub>44</sub> H <sub>79</sub> NO <sub>9</sub> P   | 796.5483     | -1.9            | -0.808    |
| PS 37:1*                          | C <sub>43</sub> H <sub>81</sub> NO <sub>10</sub> P  | 802.5659     | 6.9             | -0.802    |

Data are ranked based on SAM score values (highest to lowest). Attributions were assigned based on high mass accuracy and MS/MS measurements. Ions identified based on only high mass accuracy are marked with asterisks.

Abbreviations: SAM, significance analysis of microarrays; FA, fatty acid; PS, phosphatidylserine; PC, phosphatidylcholine; Cer, ceramide; LacCer, lactosylceramide; PE, phosphatidylethanolamine; PG, phosphatidylglycerol; PA, phosphatidic acid; PI, phosphatidylinositol; LysoPI, lysophosphatidylinositol; CL, cardiolipin; DG, diglyceride; MG, monoglyceride; FAHFA, fatty acid ester of hydroxyl fatty acid

**eTable 5.** Tentative Attribution of Compounds Identified by SAM as Having Higher Relative Abundances in Primary Type II Than Type I Tumors

| Tentative attribution  | Molecular formula                                               | Detected <i>m/z</i> | Mass error, ppm | SAM score |
|------------------------|-----------------------------------------------------------------|---------------------|-----------------|-----------|
| Not identified         | -                                                               | 186.0449            | -               | 23.579    |
| PS 44:8                | C <sub>50</sub> H <sub>81</sub> O <sub>10</sub> NP              | 886.5554            | -5.6            | 16.018    |
| Not identified         | -                                                               | 289.0371            | -               | 14.279    |
| Not identified         | -                                                               | 736.9918            | -               | 12.787    |
| FA 24:4                | C <sub>24</sub> H <sub>39</sub> O <sub>2</sub>                  | 359.2959            | 1.0             | 12.049    |
| FA 26:5                | C <sub>26</sub> H <sub>41</sub> O <sub>2</sub>                  | 385.3105            | 1.8             | 12.036    |
| CL 74:9                | C <sub>83</sub> H <sub>142</sub> O <sub>17</sub> P <sub>2</sub> | 736.4893            | 3.6             | 11.842    |
| FA 18:3                | C <sub>18</sub> H <sub>29</sub> O <sub>2</sub>                  | 277.2178            | 1.8             | 11.407    |
| Glutathione            | C <sub>10</sub> H <sub>16</sub> N <sub>3</sub> O <sub>6</sub> S | 306.0773            | 2.5             | 11.139    |
| FA 24:5                | C <sub>24</sub> H <sub>37</sub> O <sub>2</sub>                  | 357.2807            | 2.2             | 10.641    |
| Not identified         | -                                                               | 115.0195            | -               | 10.476    |
| PS 40:5                | C <sub>46</sub> H <sub>79</sub> NO <sub>10</sub> P              | 836.5367            | -9.6            | 10.448    |
| PS 40:4                | C <sub>46</sub> H <sub>81</sub> NO <sub>10</sub> P              | 838.5644            | 4.8             | 10.303    |
| N-acetylaspartic acid  | C <sub>6</sub> H <sub>8</sub> NO <sub>5</sub>                   | 174.0402            | -3.4            | 10.271    |
| Not identified         | -                                                               | 737.9970            | -               | 10.002    |
| FA 26:4                | C <sub>26</sub> H <sub>43</sub> O <sub>2</sub>                  | 387.3260            | 2.3             | 9.984     |
| Not identified         | -                                                               | 750.0001            | -               | 9.774     |
| PE O-38:6*             | C <sub>43</sub> H <sub>75</sub> NO <sub>7</sub> P               | 748.5255            | -4.2            | 8.814     |
| Not identified         | -                                                               | 142.9978            | -               | 8.742     |
| MG 18:0                | C <sub>21</sub> H <sub>40</sub> O <sub>4</sub> Cl               | 391.2620            | -0.2            | 8.668     |
| PE 40:5                | C <sub>45</sub> H <sub>79</sub> NO <sub>8</sub> P               | 792.5582            | 4.2             | 8.609     |
| FA 20:3                | C <sub>20</sub> H <sub>33</sub> O <sub>2</sub>                  | 305.2491            | 1.6             | 8.584     |
| PS 38:2                | C <sub>44</sub> H <sub>81</sub> NO <sub>10</sub> P              | 814.5577            | 3.3             | 8.505     |
| Not identified         | -                                                               | 556.3059            | -               | 8.274     |
| PS O-38:6*             | C <sub>44</sub> H <sub>75</sub> NO <sub>9</sub> P               | 792.5223            | 4.8             | 8.028     |
| PE O-36:5*             | C <sub>41</sub> H <sub>73</sub> NO <sub>7</sub> P               | 722.5150            | 2.8             | 8.017     |
| PS 38:4                | C <sub>44</sub> H <sub>77</sub> NO <sub>10</sub> P              | 810.5296            | 0.7             | 7.983     |
| PE 20:4/1:0            | C <sub>26</sub> H <sub>43</sub> NO <sub>8</sub> P               | 528.2728            | -0.8            | 7.766     |
| CL 72:8                | C <sub>81</sub> H <sub>140</sub> O <sub>17</sub> P <sub>2</sub> | 723.4808            | 2.7             | 7.759     |
| FA 17:1                | C <sub>17</sub> H <sub>31</sub> O <sub>2</sub>                  | 267.2335            | 2.0             | 7.693     |
| FA 22:5                | C <sub>22</sub> H <sub>33</sub> O <sub>2</sub>                  | 329.2494            | 2.4             | 7.674     |
| PS 40:3                | C <sub>46</sub> H <sub>83</sub> O <sub>10</sub> NP              | 842.5744            | -1.9            | 7.606     |
| PG 42:4*               | C <sub>48</sub> H <sub>87</sub> O <sub>10</sub> PCI             | 889.5720            | -1.2            | 7.559     |
| FA 18:1                | C <sub>18</sub> H <sub>32</sub> O <sub>2</sub>                  | 281.2492            | 2.1             | 7.128     |
| PA O-38:2 or PA P-38:1 | C <sub>41</sub> H <sub>79</sub> O <sub>7</sub> PCI              | 749.5278            | 1.3             | 6.959     |
| PG 34:1                | C <sub>40</sub> H <sub>76</sub> O <sub>10</sub> P               | 747.5204            | 3.0             | 6.880     |
| PI 39:4                | C <sub>48</sub> H <sub>85</sub> O <sub>13</sub> PCI             | 935.5458            | 3.9             | 6.809     |
| FA 18:2                | C <sub>18</sub> H <sub>31</sub> O <sub>2</sub>                  | 279.2327            | 1.1             | 6.706     |

| Tentative attribution (continued) | Molecular formula                                               | Detected m/z | Mass error, ppm | SAM score |
|-----------------------------------|-----------------------------------------------------------------|--------------|-----------------|-----------|
| Cer d14:1/24:1*                   | C <sub>38</sub> H <sub>73</sub> NO <sub>3</sub> Cl              | 626.5350     | 10.0            | 6.544     |
| Xanthine*                         | C <sub>5</sub> H <sub>3</sub> N <sub>4</sub> O <sub>2</sub>     | 151.0255     | -4.3            | 6.521     |
| CL 74:8                           | C <sub>83</sub> H <sub>144</sub> O <sub>17</sub> P <sub>2</sub> | 737.4921     | 3.3             | 6.376     |
| FA 16:1                           | C <sub>16</sub> H <sub>29</sub> O <sub>2</sub>                  | 253.2177     | 1.6             | 6.343     |
| PG 36:3                           | C <sub>42</sub> H <sub>76</sub> O <sub>10</sub> P               | 771.5201     | -2.5            | 6.340     |
| PE O-38:7*                        | C <sub>43</sub> H <sub>73</sub> NO <sub>7</sub> P               | 746.5132     | 0.3             | 6.154     |
| PS 36:1                           | C <sub>42</sub> H <sub>79</sub> NO <sub>10</sub> P              | 788.5466     | -2.4            | 6.035     |
| PE 39:6                           | C <sub>44</sub> H <sub>75</sub> NO <sub>8</sub> P               | 776.5258     | 2.9             | 6.001     |
| Taurine                           | C <sub>2</sub> H <sub>6</sub> NO <sub>3</sub> S                 | 124.0064     | -8.0            | 5.874     |
| PE O-38:3*                        | C <sub>43</sub> H <sub>82</sub> NO <sub>7</sub> PCl             | 790.5535     | 1.5             | 5.748     |
| FA 22:4                           | C <sub>22</sub> H <sub>35</sub> O <sub>2</sub>                  | 331.2649     | 2.0             | 5.710     |
| PE P-18:0/18:4*                   | C <sub>41</sub> H <sub>73</sub> NO <sub>7</sub> Cl              | 722.5116     | 1.9             | 5.625     |
| PS O-33:0*                        | C <sub>39</sub> H <sub>78</sub> NO <sub>9</sub> P               | 770.5071     | -4.9            | 5.597     |
| PI 38:4                           | C <sub>47</sub> H <sub>82</sub> O <sub>13</sub> P               | 885.5522     | 2.7             | 5.591     |
| FA 26:2                           | C <sub>26</sub> H <sub>47</sub> O <sub>2</sub>                  | 391.3587     | 1.4             | 5.333     |
| PS 44:9                           | C <sub>50</sub> H <sub>79</sub> O <sub>10</sub> NP              | 884.5385     | -7.0            | 5.171     |
| PI 38:3                           | C <sub>47</sub> H <sub>84</sub> O <sub>13</sub> P               | 887.5629     | -2.9            | 5.127     |
| FA 22:2                           | C <sub>22</sub> H <sub>39</sub> O <sub>2</sub>                  | 335.2952     | 1.2             | 5.049     |
| CL 78:8                           | C <sub>87</sub> H <sub>152</sub> O <sub>17</sub> P <sub>2</sub> | 765.5271     | 1.7             | 4.957     |
| PE O-38:4*                        | C <sub>43</sub> H <sub>79</sub> NO <sub>7</sub> P               | 752.5554     | -6.1            | 4.851     |
| FA 26:0                           | C <sub>26</sub> H <sub>51</sub> O <sub>2</sub>                  | 395.3889     | 1.5             | 4.808     |
| FA 20:2                           | C <sub>20</sub> H <sub>35</sub> O <sub>2</sub>                  | 307.2638     | -1.6            | 4.658     |
| FA 24:2                           | C <sub>24</sub> H <sub>43</sub> O <sub>2</sub>                  | 363.3262     | 1.9             | 4.619     |
| PS 35:2*                          | C <sub>41</sub> H <sub>75</sub> NO <sub>10</sub> P              | 772.5183     | 6.3             | 4.571     |
| PI 34:1                           | C <sub>43</sub> H <sub>80</sub> O <sub>13</sub> P               | 835.5342     | 0.0             | 4.535     |
| PE 37:5                           | C <sub>42</sub> H <sub>73</sub> NO <sub>8</sub> P               | 750.5078     | -0.1            | 4.527     |
| PS 39:4*                          | C <sub>45</sub> H <sub>79</sub> NO <sub>10</sub> P              | 824.5454     | 0.8             | 4.405     |
| FA 26:1                           | C <sub>26</sub> H <sub>49</sub> O <sub>5</sub>                  | 393.3734     | 1.0             | 4.340     |
| FA 22:3                           | C <sub>22</sub> H <sub>37</sub> O <sub>2</sub>                  | 333.2794     | 1.5             | 4.303     |
| PS P-34:1*                        | C <sub>40</sub> H <sub>75</sub> NO <sub>9</sub> P               | 744.5231     | 6.2             | 4.114     |
| PE 38:6                           | C <sub>43</sub> H <sub>73</sub> NO <sub>8</sub> P               | 762.5082     | 0.4             | 3.958     |
| FA 19:1                           | C <sub>19</sub> H <sub>35</sub> O <sub>2</sub>                  | 295.2644     | 0.5             | 3.949     |
| CL 72:7                           | C <sub>81</sub> H <sub>142</sub> O <sub>17</sub> P <sub>2</sub> | 724.4841     | 3.6             | 3.704     |
| PA 36:1                           | C <sub>39</sub> H <sub>74</sub> O <sub>8</sub> P                | 701.5120     | 1.0             | 3.702     |
| PI 37:4                           | C <sub>46</sub> H <sub>80</sub> O <sub>13</sub> P               | 871.5358     | 1.8             | 3.675     |
| CL 74:7                           | C <sub>83</sub> H <sub>146</sub> O <sub>17</sub> P <sub>2</sub> | 738.5015     | 1.1             | 3.582     |
| Cer d18:2/24:1*                   | C <sub>42</sub> H <sub>79</sub> NO <sub>3</sub> Cl              | 680.5770     | 2.4             | 3.224     |
| PG 40:6                           | C <sub>46</sub> H <sub>78</sub> O <sub>10</sub> P               | 821.5309     | 3.5             | 3.202     |
| PI 40:5                           | C <sub>49</sub> H <sub>84</sub> O <sub>13</sub> P               | 911.5667     | 1.3             | 3.076     |
| PG 38:3                           | C <sub>44</sub> H <sub>80</sub> O <sub>10</sub> P               | 799.5467     | 3.5             | 2.886     |
| Pyroglutamate                     | C <sub>5</sub> H <sub>6</sub> NO <sub>3</sub>                   | 128.0343     | -7.9            | 2.779     |



| Tentative attribution (continued) | Molecular formula                                               | Detected m/z | Mass error, ppm | SAM score |
|-----------------------------------|-----------------------------------------------------------------|--------------|-----------------|-----------|
| PS 40:2                           | C <sub>46</sub> H <sub>85</sub> O <sub>10</sub> NP              | 842.5906     | 1.3             | 2.739     |
| Cer d34:1                         | C <sub>34</sub> H <sub>67</sub> NO <sub>3</sub> Cl              | 572.4818     | 0.5             | 2.717     |
| PS 42:1                           | C <sub>48</sub> H <sub>91</sub> O <sub>10</sub> NP              | 872.6408     | 2.5             | 2.497     |
| FA 24:3                           | C <sub>24</sub> H <sub>41</sub> O <sub>2</sub>                  | 361.3106     | 1.7             | 2.401     |
| PG 18:0/18:0                      | C <sub>42</sub> H <sub>82</sub> O <sub>10</sub> P               | 777.5651     | 0.3             | 2.383     |
| PE 40:4                           | C <sub>45</sub> H <sub>81</sub> NO <sub>8</sub> P               | 794.5711     | 0.7             | 2.322     |
| PI 40:4                           | C <sub>49</sub> H <sub>86</sub> O <sub>13</sub> P               | 913.5793     | 2.1             | 2.043     |
| FA 22:6                           | C <sub>22</sub> H <sub>31</sub> O <sub>2</sub>                  | 327.2326     | 1.2             | 2.005     |
| LysoPG 18:1                       | C <sub>24</sub> H <sub>46</sub> O <sub>9</sub> P                | 509.2881     | -2.9            | 1.889     |
| PG 38:4                           | C <sub>44</sub> H <sub>78</sub> O <sub>10</sub> P               | 797.5313     | 3.1             | 1.701     |
| FA 15:0                           | C <sub>15</sub> H <sub>29</sub> O <sub>2</sub>                  | 241.2172     | -0.4            | 1.582     |
| CL 76:8                           | C <sub>85</sub> H <sub>148</sub> O <sub>17</sub> P <sub>2</sub> | 751.5086     | 2.0             | 1.451     |
| DG 34:1/0:0                       | C <sub>37</sub> H <sub>70</sub> O <sub>5</sub> Cl               | 629.4926     | 1.4             | 1.379     |
| MG 18:2*                          | C <sub>21</sub> H <sub>38</sub> O <sub>4</sub> Cl               | 389.2478     | -3.3            | 1.206     |
| Cer d36:1                         | C <sub>36</sub> H <sub>71</sub> NO <sub>3</sub> Cl              | 600.5143     | 2.5             | 1.134     |
| PG 18:0/18:1                      | C <sub>42</sub> H <sub>80</sub> O <sub>10</sub> P               | 775.5507     | 1.6             | 1.087     |
| PG 42:9                           | C <sub>48</sub> H <sub>76</sub> O <sub>10</sub> P               | 843.5198     | 1.9             | 1.081     |
| DG 36:2/0:0                       | C <sub>39</sub> H <sub>72</sub> O <sub>5</sub> Cl               | 655.5080     | 1.0             | 1.077     |
| FA 20:1                           | C <sub>20</sub> H <sub>37</sub> O <sub>2</sub>                  | 309.2795     | 2.3             | 1.014     |
| PE 38:4                           | C <sub>43</sub> H <sub>77</sub> NO <sub>8</sub> P               | 766.5411     | 2.4             | 0.992     |
| Not identified                    | -                                                               | 1104.7753    | -               | 0.962     |
| PI P-18:0/17:2                    | C <sub>44</sub> H <sub>81</sub> O <sub>12</sub> PCI             | 867.5187     | 3.2             | 0.846     |

Data are ranked based on SAM score values (highest to lowest). Attributions were assigned based on high mass accuracy and MS/MS measurements. Ions identified based on only high mass accuracy are marked with asterisks.

Abbreviations: SAM, significance analysis of microarrays; FA, fatty acid; CL, cardiolipin; PE, phosphatidylethanolamine; MG, monoglyceride; PG, phosphatidylglycerol; PA, phosphatidic acid; PI, phosphatidylinositol; Cer, ceramide; LysoPG, lysophosphatidylglycerol; DG, diglyceride; MG, monoglyceride

**eTable 6.** Tentative Attribution of Compounds Identified by SAM as Having Higher Relative Abundances in Metastatic Type I Than Type II Tumors

| Tentative attribution  | Molecular formula                                               | Detected <i>m/z</i> | Mass error, ppm | SAM score |
|------------------------|-----------------------------------------------------------------|---------------------|-----------------|-----------|
| FA 12:0                | C <sub>12</sub> H <sub>23</sub> O <sub>2</sub>                  | 199.1700            | -1.8            | -27.359   |
| PI 36:1                | C <sub>45</sub> H <sub>84</sub> O <sub>13</sub> P               | 863.5660            | 0.6             | -22.054   |
| FA 9:0                 | C <sub>9</sub> H <sub>17</sub> O <sub>2</sub>                   | 157.1226            | -5.1            | -21.089   |
| PI 32:0                | C <sub>41</sub> H <sub>78</sub> O <sub>13</sub> P               | 809.5214            | 3.5             | -19.010   |
| PI 34:1                | C <sub>43</sub> H <sub>80</sub> O <sub>13</sub> P               | 835.5368            | 3.1             | -18.869   |
| FA 8:0                 | C <sub>8</sub> H <sub>15</sub> O <sub>2</sub>                   | 143.1068            | -6.7            | -17.678   |
| PI 34:0                | C <sub>43</sub> H <sub>82</sub> O <sub>13</sub> P               | 837.5465            | -4.0            | -16.978   |
| PS 40:4                | C <sub>46</sub> H <sub>81</sub> NO <sub>10</sub> P              | 838.5624            | 2.4             | -16.454   |
| FA 10:0                | C <sub>10</sub> H <sub>19</sub> O <sub>2</sub>                  | 171.1385            | -3.2            | -15.064   |
| PE O-38:5              | C <sub>43</sub> H <sub>77</sub> NO <sub>7</sub> P               | 750.5452            | 1.2             | -14.994   |
| Gluconic acid          | C <sub>6</sub> H <sub>11</sub> O <sub>7</sub>                   | 195.0506            | -2.2            | -14.851   |
| Uridine*               | C <sub>9</sub> H <sub>11</sub> N <sub>2</sub> O <sub>6</sub>    | 243.0624            | 0.6             | -13.261   |
| PI 36:2                | C <sub>45</sub> H <sub>82</sub> O <sub>13</sub> P               | 861.5486            | 1.5             | -12.448   |
| PE O-40:5 or PE P-40:4 | C <sub>45</sub> H <sub>81</sub> NO <sub>7</sub> P               | 778.5781            | 3.2             | -11.774   |
| Cer d34:1              | C <sub>34</sub> H <sub>67</sub> NO <sub>3</sub> Cl              | 572.4819            | 0.7             | -11.681   |
| Cer d42:0              | C <sub>42</sub> H <sub>81</sub> NO <sub>3</sub> Cl              | 682.5906            | -0.7            | -11.212   |
| Not identified         | -                                                               | 126.9040            | -               | -11.100   |
| PS 38:4                | C <sub>44</sub> H <sub>77</sub> NO <sub>10</sub> P              | 810.5308            | 1.9             | -10.963   |
| Cer d42:1              | C <sub>42</sub> H <sub>83</sub> NO <sub>3</sub> Cl              | 684.6072            | 0.7             | -10.917   |
| PS 42:6*               | C <sub>48</sub> H <sub>82</sub> O <sub>10</sub> NP              | 862.5556            | -5.5            | -10.473   |
| Cer d36:1              | C <sub>36</sub> H <sub>71</sub> NO <sub>3</sub> Cl              | 600.5143            | 2.5             | -10.214   |
| Cer d38:1              | C <sub>40</sub> H <sub>79</sub> NO <sub>3</sub> Cl              | 656.5779            | 3.8             | -9.935    |
| PI 38:2                | C <sub>47</sub> H <sub>86</sub> O <sub>13</sub> P               | 889.5752            | -6.7            | -9.714    |
| PS 36:1                | C <sub>42</sub> H <sub>79</sub> NO <sub>10</sub> P              | 788.5466            | -2.4            | -9.425    |
| FA 15:4                | C <sub>15</sub> H <sub>21</sub> O <sub>2</sub>                  | 233.1546            | -0.4            | -9.386    |
| PI 40:5                | C <sub>49</sub> H <sub>84</sub> O <sub>13</sub> P               | 911.5638            | -1.9            | -9.078    |
| Not identified         | -                                                               | 713.9970            | -               | -8.686    |
| PA 36:1                | C <sub>39</sub> H <sub>74</sub> O <sub>8</sub> P                | 701.5134            | 1.0             | -8.538    |
| Not identified         | -                                                               | 146.9650            | -               | -8.533    |
| PE O-38:3*             | C <sub>43</sub> H <sub>82</sub> NO <sub>7</sub> PCI             | 790.5528            | 0.6             | -8.070    |
| Not identified         | -                                                               | 186.0492            | -               | -7.868    |
| PE O-40:8              | C <sub>45</sub> H <sub>76</sub> NO <sub>8</sub> PCI             | 808.5068            | 1.8             | -7.761    |
| PS 36:2                | C <sub>42</sub> H <sub>77</sub> NO <sub>10</sub> P              | 786.5322            | 4.0             | -7.456    |
| CL 72:4                | C <sub>81</sub> H <sub>148</sub> O <sub>17</sub> P <sub>2</sub> | 727.5054            | 2.0             | -7.263    |
| Not identified         | -                                                               | 333.0946            | -               | -7.173    |
| PE O-34:2 or PE P-34:1 | C <sub>39</sub> H <sub>75</sub> NO <sub>7</sub> P               | 700.5309            | 3.2             | -7.100    |
| PS 40:3                | C <sub>46</sub> H <sub>83</sub> NO <sub>10</sub> P              | 840.5746            | -1.7            | -7.023    |
| FA 11:0                | C <sub>11</sub> H <sub>21</sub> O <sub>2</sub>                  | 185.1541            | -3.3            | -6.346    |

| Tentative attribution (continued) | Molecular formula                                                | Detected m/z | Mass error, ppm | SAM score |
|-----------------------------------|------------------------------------------------------------------|--------------|-----------------|-----------|
| PE O-38:6*                        | C <sub>43</sub> H <sub>75</sub> NO <sub>7</sub> P                | 748.5279     | 2.3             | -6.337    |
| LysoPI 18:0                       | C <sub>27</sub> H <sub>52</sub> O <sub>12</sub> P                | 599.3215     | 2.2             | -6.335    |
| PI 32:1                           | C <sub>41</sub> H <sub>76</sub> O <sub>13</sub> P                | 807.5016     | 1.6             | -6.104    |
| PI 25:1                           | C <sub>44</sub> H <sub>82</sub> O <sub>13</sub> P                | 849.5519     | -2.4            | -6.022    |
| Not identified                    | -                                                                | 188.0729     | -               | -5.991    |
| CL 70:4                           | C <sub>79</sub> H <sub>144</sub> O <sub>17</sub> P <sub>2</sub>  | 713.4935     | -1.4            | -5.880    |
| PE 39:5                           | C <sub>44</sub> H <sub>77</sub> NO <sub>8</sub> P                | 778.5414     | 2.8             | -5.601    |
| FA 7:0                            | C <sub>7</sub> H <sub>13</sub> O <sub>2</sub>                    | 129.0915     | -4.7            | -5.576    |
| PA 24:1                           | C <sub>37</sub> H <sub>70</sub> O <sub>8</sub> P                 | 673.4832     | 2.7             | -5.495    |
| PI 34:2                           | C <sub>43</sub> H <sub>78</sub> O <sub>13</sub> P                | 833.5211     | 3.1             | -5.466    |
| PS 42:4*                          | C <sub>48</sub> H <sub>85</sub> NO <sub>10</sub> P               | 866.5924     | 0.9             | -5.370    |
| PE 18:1/1:0                       | C <sub>24</sub> H <sub>45</sub> NO <sub>8</sub> P                | 506.2899     | 2.1             | -5.243    |
| PS 40:2                           | C <sub>46</sub> H <sub>85</sub> O <sub>10</sub> NP               | 842.5906     | 1.3             | -5.066    |
| PS 38:1                           | C <sub>44</sub> H <sub>83</sub> O <sub>10</sub> NP               | 816.5745     | 1.8             | -5.065    |
| PE O-36:2*                        | C <sub>41</sub> H <sub>79</sub> NO <sub>7</sub> P                | 728.5619     | 2.6             | -4.998    |
| Not identified                    | -                                                                | 191.0726     | -               | -4.893    |
| PE O-36:3 or P-36:2               | C <sub>41</sub> H <sub>77</sub> NO <sub>7</sub> P                | 726.5459     | 2.2             | -4.655    |
| PE 39:1                           | C <sub>44</sub> H <sub>86</sub> NO <sub>8</sub> PCI              | 822.5730     | -6.7            | -4.541    |
| PS O-40:5*                        | C <sub>46</sub> H <sub>81</sub> O <sub>9</sub> NP                | 822.5660     | 0.7             | -4.541    |
| FA 15:0                           | C <sub>15</sub> H <sub>29</sub> O <sub>2</sub>                   | 241.2172     | -0.4            | -4.388    |
| PG dO-40:9*                       | C <sub>46</sub> H <sub>76</sub> O <sub>8</sub> P                 | 787.5333     | 6.4             | -4.294    |
| PS 38:3                           | C <sub>44</sub> H <sub>79</sub> NO <sub>10</sub> P               | 812.5463     | 2.0             | -4.242    |
| PS 38:2                           | C <sub>44</sub> H <sub>81</sub> NO <sub>10</sub> P               | 814.5577     | 3.3             | -4.193    |
| CL 80:8                           | C <sub>89</sub> H <sub>156</sub> O <sub>17</sub> P <sub>2</sub>  | 779.5440     | 3.3             | -4.020    |
| PS 34:1                           | C <sub>40</sub> H <sub>75</sub> NO <sub>10</sub> P               | 760.5158     | 3.1             | -2.917    |
| FA 10:6;O*                        | C <sub>10</sub> H <sub>7</sub> O <sub>3</sub>                    | 175.0409     | 4.8             | -2.852    |
| Cer m42:1                         | C <sub>42</sub> H <sub>83</sub> NO <sub>2</sub> Cl               | 668.6140     | 3.3             | -2.824    |
| Glucose                           | C <sub>6</sub> H <sub>12</sub> O <sub>6</sub> Cl                 | 215.0326     | -0.9            | -2.749    |
| PE 36:1                           | C <sub>41</sub> H <sub>79</sub> NO <sub>8</sub> P                | 744.5558     | 1.2             | -2.728    |
| PS 40:1                           | C <sub>46</sub> H <sub>87</sub> O <sub>10</sub> NP               | 844.6080     | 0.8             | -2.708    |
| Not identified                    | -                                                                | 265.1472     | -               | -2.684    |
| PS 42:2                           | C <sub>48</sub> H <sub>89</sub> O <sub>10</sub> NP               | 870.6248     | 2.1             | -2.554    |
| FA 17:0                           | C <sub>17</sub> H <sub>33</sub> O <sub>2</sub>                   | 269.2489     | 1.1             | -2.486    |
| Benzoic acid                      | C <sub>7</sub> H <sub>5</sub> O <sub>2</sub>                     | 121.0286     | -7.5            | -2.484    |
| Not identified                    | -                                                                | 293.1762     | -               | -2.430    |
| FA 20:5                           | C <sub>20</sub> H <sub>29</sub> O <sub>2</sub>                   | 301.2174     | 0.3             | -2.428    |
| PI 40:4                           | C <sub>49</sub> H <sub>86</sub> O <sub>13</sub> P                | 913.5816     | 0.5             | -2.274    |
| PS 44:8                           | C <sub>50</sub> H <sub>81</sub> O <sub>10</sub> NP               | 886.5557     | -5.2            | -2.199    |
| MG 20:0                           | C <sub>23</sub> H <sub>46</sub> O <sub>4</sub> Cl                | 421.3103     | 3.1             | -2.133    |
| Prolyl-Glutamine*                 | C <sub>10</sub> H <sub>17</sub> N <sub>3</sub> O <sub>4</sub> Cl | 278.0929     | 5.7             | -2.102    |
| PA 32:0                           | C <sub>35</sub> H <sub>68</sub> O <sub>8</sub> P                 | 647.4686     | 4.4             | -2.071    |

| Tentative attribution (continued) | Molecular formula                                           | Detected m/z | Mass error, ppm | SAM score |
|-----------------------------------|-------------------------------------------------------------|--------------|-----------------|-----------|
| Not identified                    | -                                                           | 556.3044     | -               | -1.841    |
| PS 37:4*                          | C <sub>43</sub> H <sub>75</sub> NO <sub>10</sub> P          | 796.5167     | 4.1             | -1.777    |
| Not identified                    | -                                                           | 146.9820     | -               | -1.638    |
| PE 39:4*                          | C <sub>44</sub> H <sub>80</sub> NO <sub>8</sub> PCI         | 816.5395     | 9.7             | -1.610    |
| PG 42:3*                          | C <sub>48</sub> H <sub>89</sub> O <sub>10</sub> PCI         | 891.5912     | 2.8             | -1.609    |
| 2-Dodecylbenzenesulfonic acid*    | C <sub>18</sub> H <sub>29</sub> O <sub>3</sub> S            | 325.1850     | 2.3             | -1.605    |
| FA 13:8                           | C <sub>13</sub> H <sub>9</sub> O <sub>2</sub>               | 197.0605     | -1.5            | -1.589    |
| FA 18:0                           | C <sub>18</sub> H <sub>35</sub> O <sub>2</sub>              | 283.2648     | 1.9             | -1.494    |
| Not identified                    | -                                                           | 348.1582     | -               | -1.490    |
| Valerenolic acid                  | C <sub>15</sub> H <sub>21</sub> O <sub>3</sub>              | 249.1495     | -0.5            | -1.469    |
| Not identified                    | -                                                           | 152.9853     | -               | -1.464    |
| PG 40:8                           | C <sub>46</sub> H <sub>74</sub> O <sub>10</sub> P           | 817.5011     | 1.7             | -1.211    |
| Capryloylglycine*                 | C <sub>10</sub> H <sub>19</sub> NO <sub>3</sub> Cl          | 236.1057     | -0.8            | -1.082    |
| PG 44:5                           | C <sub>50</sub> H <sub>89</sub> O <sub>10</sub> PCI         | 915.5917     | 3.2             | -1.055    |
| MG 18:2*                          | C <sub>21</sub> H <sub>38</sub> O <sub>4</sub> Cl           | 389.2478     | -3.3            | -1.037    |
| DG 34:1/0:0                       | C <sub>37</sub> H <sub>70</sub> O <sub>5</sub> Cl           | 629.4917     | 0.0             | -0.943    |
| Not identified                    | -                                                           | 699.9829     | -               | -0.815    |
| PG 40:5                           | C <sub>46</sub> H <sub>80</sub> O <sub>10</sub> P           | 823.5496     | 0.2             | -0.745    |
| MG 18:0                           | C <sub>21</sub> H <sub>40</sub> O <sub>4</sub> Cl           | 391.2620     | -0.2            | -0.620    |
| PE O-36:5*                        | C <sub>41</sub> H <sub>73</sub> NO <sub>7</sub> P           | 722.5158     | 3.9             | -0.619    |
| Cer d18:1/20:0*                   | C <sub>38</sub> H <sub>75</sub> NO <sub>3</sub> Cl          | 628.5458     | 2.7             | -0.559    |
| PA 40:1                           | C <sub>43</sub> H <sub>83</sub> O <sub>8</sub> PCI          | 793.5601     | 10.3            | -0.551    |
| PE 34:1                           | C <sub>39</sub> H <sub>75</sub> NO <sub>8</sub> P           | 716.5255     | 2.7             | -0.534    |
| Not identified                    | -                                                           | 114.9351     | -               | -0.490    |
| FA 12:5;O2*                       | C <sub>12</sub> H <sub>13</sub> O <sub>4</sub>              | 221.0815     | -2.0            | -0.432    |
| Not identified                    | -                                                           | 289.0371     | -               | -0.362    |
| PE O-38:4*                        | C <sub>43</sub> H <sub>79</sub> NO <sub>7</sub> P           | 752.5563     | -4.9            | -0.294    |
| PE 28:2;O3*                       | C <sub>33</sub> H <sub>61</sub> NO <sub>11</sub> P          | 678.3983     | -0.7            | -0.101    |
| Xanthine*                         | C <sub>5</sub> H <sub>3</sub> N <sub>4</sub> O <sub>2</sub> | 151.0252     | -6.3            | -0.099    |

Data are ranked based on SAM score values (highest to lowest). Attributions were assigned based on high mass accuracy and MS/MS measurements. Ions identified based on only high mass accuracy are marked with asterisks.

Abbreviations: SAM, significance analysis of microarrays; FA, fatty acid; PI, phosphatidylinositol; PS, phosphatidylserine; PE, phosphatidylethanolamine; Cer, ceramide; PA, phosphatidic acid; CL, cardiolipin; LysoPI, lysophosphatidylinositol; PG, phosphatidylglycerol; MG, monoglyceride; DG, diglyceride

**eTable 7.** Tentative Attribution of Compounds Identified by SAM as Having Higher Relative Abundances in Metastatic Type II Than Type I Tumors

| Tentative attribution  | Molecular formula                                               | Detected <i>m/z</i> | Mass error, ppm | SAM score |
|------------------------|-----------------------------------------------------------------|---------------------|-----------------|-----------|
| PG 34:1                | C <sub>40</sub> H <sub>76</sub> O <sub>10</sub> P               | 747.5198            | 2.2             | 22.505    |
| FA 18:2                | C <sub>18</sub> H <sub>31</sub> O <sub>2</sub>                  | 279.2335            | 2.0             | 21.522    |
| FA 18:1                | C <sub>18</sub> H <sub>32</sub> O <sub>2</sub>                  | 281.2492            | 2.1             | 17.735    |
| N-acetylaspartic acid  | C <sub>6</sub> H <sub>8</sub> NO <sub>5</sub>                   | 174.0402            | -3.4            | 17.214    |
| CL 72:8                | C <sub>81</sub> H <sub>140</sub> O <sub>17</sub> P <sub>2</sub> | 723.4811            | 3.1             | 16.476    |
| PG 36:4                | C <sub>42</sub> H <sub>74</sub> O <sub>10</sub> P               | 769.5059            | 4.4             | 14.636    |
| PG 34:2                | C <sub>40</sub> H <sub>74</sub> O <sub>10</sub> P               | 745.5015            | -1.4            | 14.597    |
| Taurine                | C <sub>2</sub> H <sub>6</sub> NO <sub>3</sub> S                 | 124.0064            | -8.0            | 13.866    |
| PG 36:3                | C <sub>42</sub> H <sub>76</sub> O <sub>10</sub> P               | 771.5201            | -2.5            | 12.985    |
| PG 36:2                | C <sub>42</sub> H <sub>78</sub> O <sub>10</sub> P               | 773.5340            | 0.2             | 12.916    |
| FA 20:1                | C <sub>20</sub> H <sub>37</sub> O <sub>2</sub>                  | 309.2795            | 2.3             | 12.742    |
| CL 74:9                | C <sub>83</sub> H <sub>142</sub> O <sub>17</sub> P <sub>2</sub> | 736.4906            | 5.3             | 12.670    |
| FA 20:2                | C <sub>20</sub> H <sub>35</sub> O <sub>2</sub>                  | 307.2638            | -1.6            | 12.546    |
| Ascorbic acid          | C <sub>6</sub> H <sub>7</sub> O <sub>6</sub>                    | 175.0243            | -2.9            | 12.545    |
| PS 35:2*               | C <sub>41</sub> H <sub>75</sub> NO <sub>10</sub> P              | 772.5187            | 6.8             | 12.516    |
| Not identified         | -                                                               | 736.9918            | -               | 12.069    |
| CL 70:7                | C <sub>79</sub> H <sub>138</sub> O <sub>17</sub> P <sub>2</sub> | 710.4689            | 3.0             | 11.960    |
| Glutamine              | C <sub>5</sub> H <sub>9</sub> N <sub>2</sub> O <sub>3</sub>     | 145.0621            | -1.4            | 11.747    |
| PA O-38:2 or PA P-38:1 | C <sub>41</sub> H <sub>79</sub> O <sub>7</sub> PCI              | 749.5278            | 1.3             | 11.508    |
| PE O-38:7*             | C <sub>43</sub> H <sub>73</sub> NO <sub>7</sub> P               | 746.5132            | 0.3             | 10.513    |
| CL 74:8                | C <sub>83</sub> H <sub>144</sub> O <sub>17</sub> P <sub>2</sub> | 737.4921            | 3.3             | 10.300    |
| CL 72:7                | C <sub>81</sub> H <sub>142</sub> O <sub>17</sub> P <sub>2</sub> | 724.4855            | -1.6            | 10.259    |
| Glutathione            | C <sub>10</sub> H <sub>16</sub> N <sub>3</sub> O <sub>6</sub> S | 306.0771            | 1.9             | 9.958     |
| FA 22:5                | C <sub>22</sub> H <sub>33</sub> O <sub>2</sub>                  | 329.2493            | 2.1             | 9.806     |
| PS P-36:2 or PS O-36:3 | C <sub>42</sub> H <sub>77</sub> NO <sub>9</sub> P               | 770.5368            | 3.4             | 9.770     |
| PG 40:7                | C <sub>46</sub> H <sub>76</sub> O <sub>10</sub> P               | 819.5203            | 2.6             | 9.134     |
| FA 22:4                | C <sub>22</sub> H <sub>35</sub> O <sub>2</sub>                  | 331.2649            | 2.0             | 9.122     |
| PS O-36:4 or PS P-36:3 | C <sub>42</sub> H <sub>75</sub> NO <sub>9</sub> P               | 768.5211            | -3.4            | 9.054     |
| PI 36:4                | C <sub>45</sub> H <sub>78</sub> O <sub>13</sub> P               | 857.5210            | 2.9             | 8.847     |
| CL 78:8                | C <sub>87</sub> H <sub>152</sub> O <sub>17</sub> P <sub>2</sub> | 765.5271            | 1.7             | 8.741     |
| PG 38:3                | C <sub>44</sub> H <sub>80</sub> O <sub>10</sub> P               | 799.5467            | 3.5             | 8.607     |
| CL 74:6                | C <sub>83</sub> H <sub>148</sub> O <sub>17</sub> P <sub>2</sub> | 739.5074            | 3.7             | 8.205     |
| FA 16:1                | C <sub>16</sub> H <sub>29</sub> O <sub>2</sub>                  | 253.2176            | 1.2             | 8.076     |
| FA 22:2                | C <sub>22</sub> H <sub>39</sub> O <sub>2</sub>                  | 335.2966            | 3.1             | 7.838     |
| FA 18:3                | C <sub>18</sub> H <sub>29</sub> O <sub>2</sub>                  | 277.2178            | 1.8             | 7.782     |
| FA 20:3                | C <sub>20</sub> H <sub>33</sub> O <sub>2</sub>                  | 305.2493            | 1.3             | 7.619     |
| PG 32:0                | C <sub>38</sub> H <sub>75</sub> O <sub>10</sub> P               | 721.5026            | 0.1             | 7.618     |
| PE 36:3                | C <sub>41</sub> H <sub>75</sub> NO <sub>8</sub> P               | 740.5263            | 3.7             | 7.549     |

| Tentative attribution (continued) | Molecular formula                                                 | Detected m/z | Mass error, ppm | SAM score |
|-----------------------------------|-------------------------------------------------------------------|--------------|-----------------|-----------|
| PE 36:2                           | C <sub>41</sub> H <sub>77</sub> NO <sub>8</sub> P                 | 742.5407     | 2.0             | 7.477     |
| PI 38:4                           | C <sub>47</sub> H <sub>82</sub> O <sub>13</sub> P                 | 885.5522     | 2.7             | 7.192     |
| Cer d18:2/28:0*                   | C <sub>46</sub> H <sub>89</sub> NO <sub>3</sub> Cl                | 738.6605     | 9.3             | 7.059     |
| PG 18:0/18:1                      | C <sub>42</sub> H <sub>80</sub> O <sub>10</sub> P                 | 775.5507     | 1.6             | 6.738     |
| PG 40:6                           | C <sub>46</sub> H <sub>78</sub> O <sub>10</sub> P                 | 821.5309     | 3.5             | 6.593     |
| PE 20:3/1:0*                      | C <sub>26</sub> H <sub>45</sub> NO <sub>8</sub> P                 | 530.2912     | -4.5            | 6.542     |
| FA 19:1                           | C <sub>19</sub> H <sub>35</sub> O <sub>2</sub>                    | 295.2644     | 0.5             | 6.337     |
| FA 26:2                           | C <sub>26</sub> H <sub>47</sub> O <sub>2</sub>                    | 391.3587     | 1.4             | 6.329     |
| PE 38:5                           | C <sub>43</sub> H <sub>75</sub> NO <sub>8</sub> P                 | 764.5244     | 1.1             | 6.223     |
| Not identified                    | -                                                                 | 116.9334     | -               | 6.024     |
| Not identified                    | -                                                                 | 158.9109     | -               | 5.940     |
| FA 22:1                           | C <sub>22</sub> H <sub>41</sub> O <sub>2</sub>                    | 337.3115     | 0.9             | 5.875     |
| Not identified                    | -                                                                 | 160.9109     | -               | 5.822     |
| PS 37:2*                          | C <sub>43</sub> H <sub>79</sub> NO <sub>10</sub> P                | 800.5501     | 6.7             | 5.717     |
| PS 37:1*                          | C <sub>43</sub> H <sub>81</sub> NO <sub>10</sub> P                | 802.5659     | 6.9             | 5.716     |
| FA 16:0                           | C <sub>16</sub> H <sub>31</sub> O <sub>2</sub>                    | 255.2333     | 1.4             | 5.492     |
| CL 76:8                           | C <sub>85</sub> H <sub>148</sub> O <sub>17</sub> P <sub>2</sub>   | 751.5086     | 2.0             | 5.450     |
| CL 70:6                           | C <sub>79</sub> H <sub>140</sub> O <sub>17</sub> P <sub>2</sub>   | 711.4767     | 3.0             | 5.339     |
| PE 38:6                           | C <sub>43</sub> H <sub>73</sub> NO <sub>8</sub> P                 | 762.5082     | 0.4             | 5.063     |
| Not identified                    | -                                                                 | 115.0195     | -               | 4.884     |
| 2-Dodecylbenzenesulfonic acid*    | C <sub>18</sub> H <sub>29</sub> O <sub>3</sub> S                  | 325.1850     | 2.3             | 4.761     |
| 3-Hydroxypicolinic acid           | C <sub>6</sub> H <sub>4</sub> NO <sub>3</sub>                     | 138.0187     | -7.0            | 4.740     |
| FA 24:2                           | C <sub>24</sub> H <sub>43</sub> O <sub>2</sub>                    | 363.3262     | 1.9             | 4.619     |
| PE 20:4/1:0                       | C <sub>26</sub> H <sub>43</sub> NO <sub>8</sub> P                 | 528.2728     | -0.8            | 4.585     |
| PS O-38:4 or P-38:3               | C <sub>44</sub> H <sub>79</sub> NO <sub>9</sub> P                 | 796.5483     | -1.9            | 4.547     |
| CL 72:6                           | C <sub>81</sub> H <sub>144</sub> O <sub>17</sub> P <sub>2</sub>   | 725.4940     | -0.7            | 4.451     |
| FA 20:0                           | C <sub>20</sub> H <sub>39</sub> O <sub>2</sub>                    | 311.2956     | 0.1             | 4.437     |
| PA 36:3                           | C <sub>39</sub> H <sub>70</sub> O <sub>8</sub> P                  | 697.4815     | 0.2             | 4.426     |
| PS 44:9                           | C <sub>50</sub> H <sub>79</sub> O <sub>10</sub> NP                | 884.5385     | -7.0            | 4.401     |
| PI 38:5                           | C <sub>47</sub> H <sub>80</sub> O <sub>13</sub> P                 | 883.5338     | -0.5            | 4.396     |
| PI 37:4                           | C <sub>46</sub> H <sub>80</sub> O <sub>13</sub> P                 | 871.5358     | 1.8             | 4.386     |
| PG 38:4                           | C <sub>44</sub> H <sub>78</sub> O <sub>10</sub> P                 | 797.5313     | 3.1             | 4.316     |
| PI 37:3                           | C <sub>46</sub> H <sub>82</sub> O <sub>13</sub> P                 | 873.5506     | -0.8            | 4.234     |
| FA 22:3                           | C <sub>22</sub> H <sub>37</sub> O <sub>2</sub>                    | 333.2794     | 1.5             | 4.210     |
| FA 24:4                           | C <sub>24</sub> H <sub>39</sub> O <sub>2</sub>                    | 359.2959     | 1.0             | 3.968     |
| PE O-36:4*                        | C <sub>41</sub> H <sub>75</sub> NO <sub>7</sub> P                 | 724.5296     | 1.3             | 3.851     |
| FA 22:6                           | C <sub>22</sub> H <sub>31</sub> O <sub>2</sub>                    | 327.2333     | 1.1             | 3.720     |
| PI 38:3                           | C <sub>47</sub> H <sub>84</sub> O <sub>13</sub> P                 | 887.5629     | -2.9            | 3.366     |
| PE 34:2                           | C <sub>39</sub> H <sub>73</sub> NO <sub>8</sub> P                 | 714.5109     | 4.2             | 3.350     |
| PE-Cer d37:1                      | C <sub>39</sub> H <sub>79</sub> N <sub>2</sub> O <sub>6</sub> PCI | 737.5359     | 1.5             | 3.252     |
| FA 20:4*                          | C <sub>20</sub> H <sub>32</sub> O <sub>2</sub> Cl                 | 339.2088     | 2.4             | 3.242     |

| Tentative attribution (continued) | Molecular formula                                               | Detected m/z | Mass error, ppm | SAM score |
|-----------------------------------|-----------------------------------------------------------------|--------------|-----------------|-----------|
| LysoPI 15:0                       | C <sub>24</sub> H <sub>46</sub> O <sub>12</sub> P               | 557.2729     | 0.5             | 3.161     |
| Glutamic acid                     | C <sub>5</sub> H <sub>8</sub> NO <sub>4</sub>                   | 146.0449     | -6.7            | 3.130     |
| Pyroglutamate                     | C <sub>5</sub> H <sub>6</sub> NO <sub>3</sub>                   | 128.0343     | -7.9            | 3.071     |
| PE 37:5                           | C <sub>42</sub> H <sub>73</sub> NO <sub>8</sub> P               | 750.5078     | -0.1            | 3.071     |
| FA 26:1                           | C <sub>26</sub> H <sub>49</sub> O <sub>5</sub>                  | 393.3734     | 1.0             | 3.011     |
| FA 14:0                           | C <sub>14</sub> H <sub>27</sub> O <sub>2</sub>                  | 227.2014     | -1.1            | 2.912     |
| PG 22:1                           | C <sub>38</sub> H <sub>72</sub> O <sub>10</sub> P               | 719.4879     | 1.4             | 2.891     |
| PS 42:1                           | C <sub>48</sub> H <sub>91</sub> O <sub>10</sub> NP              | 872.6408     | 2.5             | 2.856     |
| PG 38:6                           | C <sub>44</sub> H <sub>74</sub> O <sub>10</sub> P               | 793.5020     | -0.6            | 2.411     |
| CL 79:7                           | C <sub>85</sub> H <sub>150</sub> O <sub>17</sub> P <sub>2</sub> | 752.5180     | 0.1             | 2.236     |
| PI 38:6                           | C <sub>47</sub> H <sub>78</sub> O <sub>13</sub> P               | 881.5209     | 2.7             | 2.182     |
| PG 18:0/18:0                      | C <sub>42</sub> H <sub>82</sub> O <sub>10</sub> P               | 777.5651     | 0.3             | 2.150     |
| CL 78:6*                          | C <sub>87</sub> H <sub>156</sub> O <sub>17</sub> P <sub>2</sub> | 767.5438     | 3.1             | 2.082     |
| FA 26:0                           | C <sub>26</sub> H <sub>51</sub> O <sub>2</sub>                  | 395.3889     | 1.5             | 1.982     |
| Not identified                    | -                                                               | 356.2645     | -               | 1.827     |
| DG 36:3/0:0                       | C <sub>39</sub> H <sub>70</sub> O <sub>5</sub> Cl               | 653.4928     | 1.6             | 1.734     |
| Not identified                    | -                                                               | 123.9012     | -               | 1.709     |
| FA 24:1                           | C <sub>24</sub> H <sub>45</sub> O <sub>2</sub>                  | 365.3427     | 0.5             | 1.618     |
| FA 17:1                           | C <sub>17</sub> H <sub>31</sub> O <sub>2</sub>                  | 267.2331     | 0.5             | 1.417     |
| PA 24:2                           | C <sub>37</sub> H <sub>68</sub> O <sub>8</sub> P                | 671.4676     | 2.8             | 1.324     |
| CL 74:0*                          | C <sub>83</sub> H <sub>160</sub> O <sub>17</sub> P <sub>2</sub> | 745.5604     | 4.4             | 1.287     |
| PS 39:3                           | C <sub>45</sub> H <sub>81</sub> NO <sub>10</sub> P              | 826.5628     | -2.9            | 1.195     |
| FA 9:1;O2*                        | C <sub>9</sub> H <sub>16</sub> O <sub>4</sub>                   | 187.0972     | -2.0            | 1.150     |
| PE 39:6                           | C <sub>44</sub> H <sub>75</sub> NO <sub>8</sub> P               | 776.5258     | 2.9             | 1.122     |

Data are ranked based on SAM score values (highest to lowest). Attributions were assigned based on high mass accuracy and MS/MS measurements. Ions identified based on only high mass accuracy are marked with asterisks.

Abbreviations: SAM, significance analysis of microarray; PG, phosphatidylglycerol; FA, fatty acid; CL, cardiolipin; PS, phosphatidylserine; PA, phosphatidic acid; PE, phosphatidylethanolamine; PI, phosphatidylinositol; Cer, ceramide; LysoPI, lysophosphatidylinositol; DG, diglyceride

**eFigure 1.** Outline of the Study

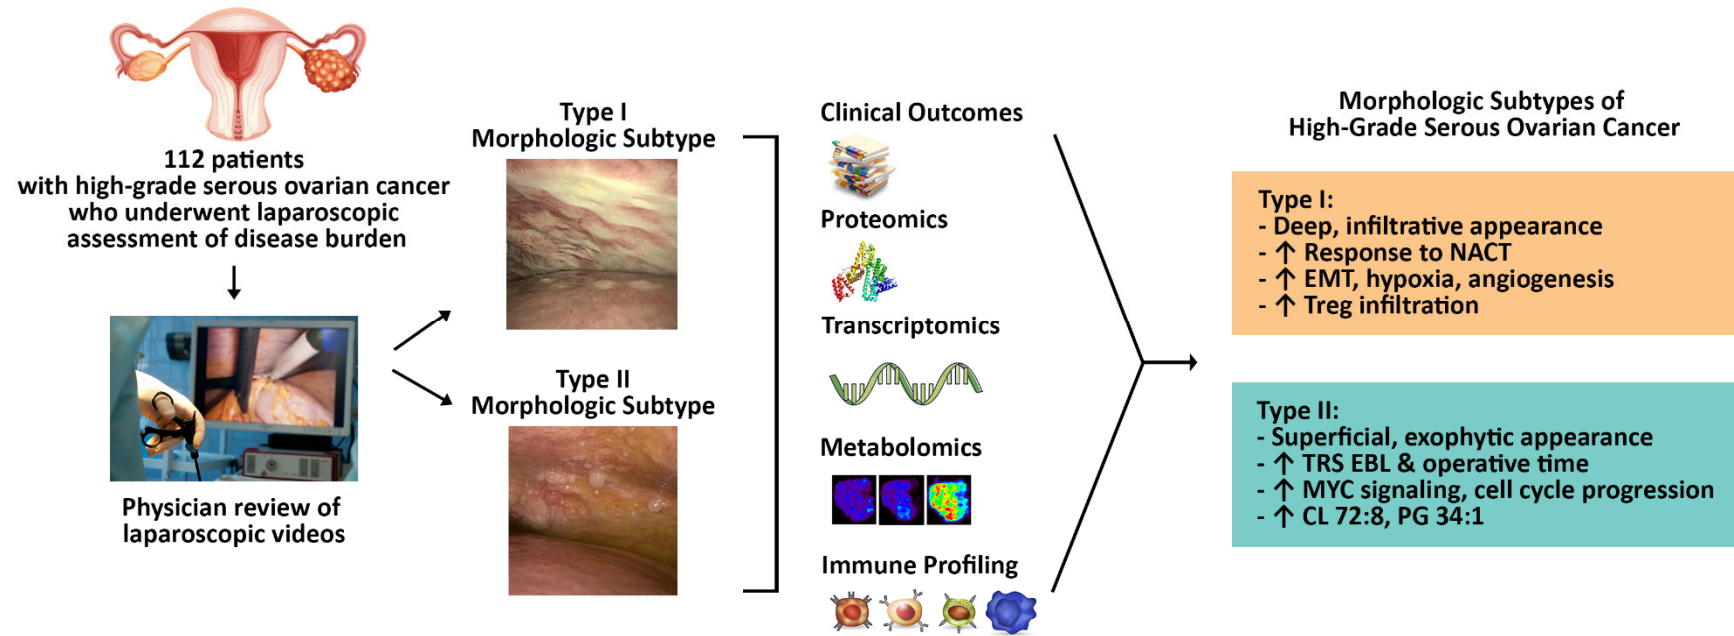

Abbreviations: NACT, neoadjuvant chemotherapy; EMT, epithelial-mesenchymal transition; Treg, regulatory T cell; TRS, tumor reductive surgery; CL, cardiolipin; PG, phosphatidylglycerol



**eFigure 2.** NetWalker Analysis of Proteins With Significantly Altered Expression Levels Between Type I and Type II Tumors

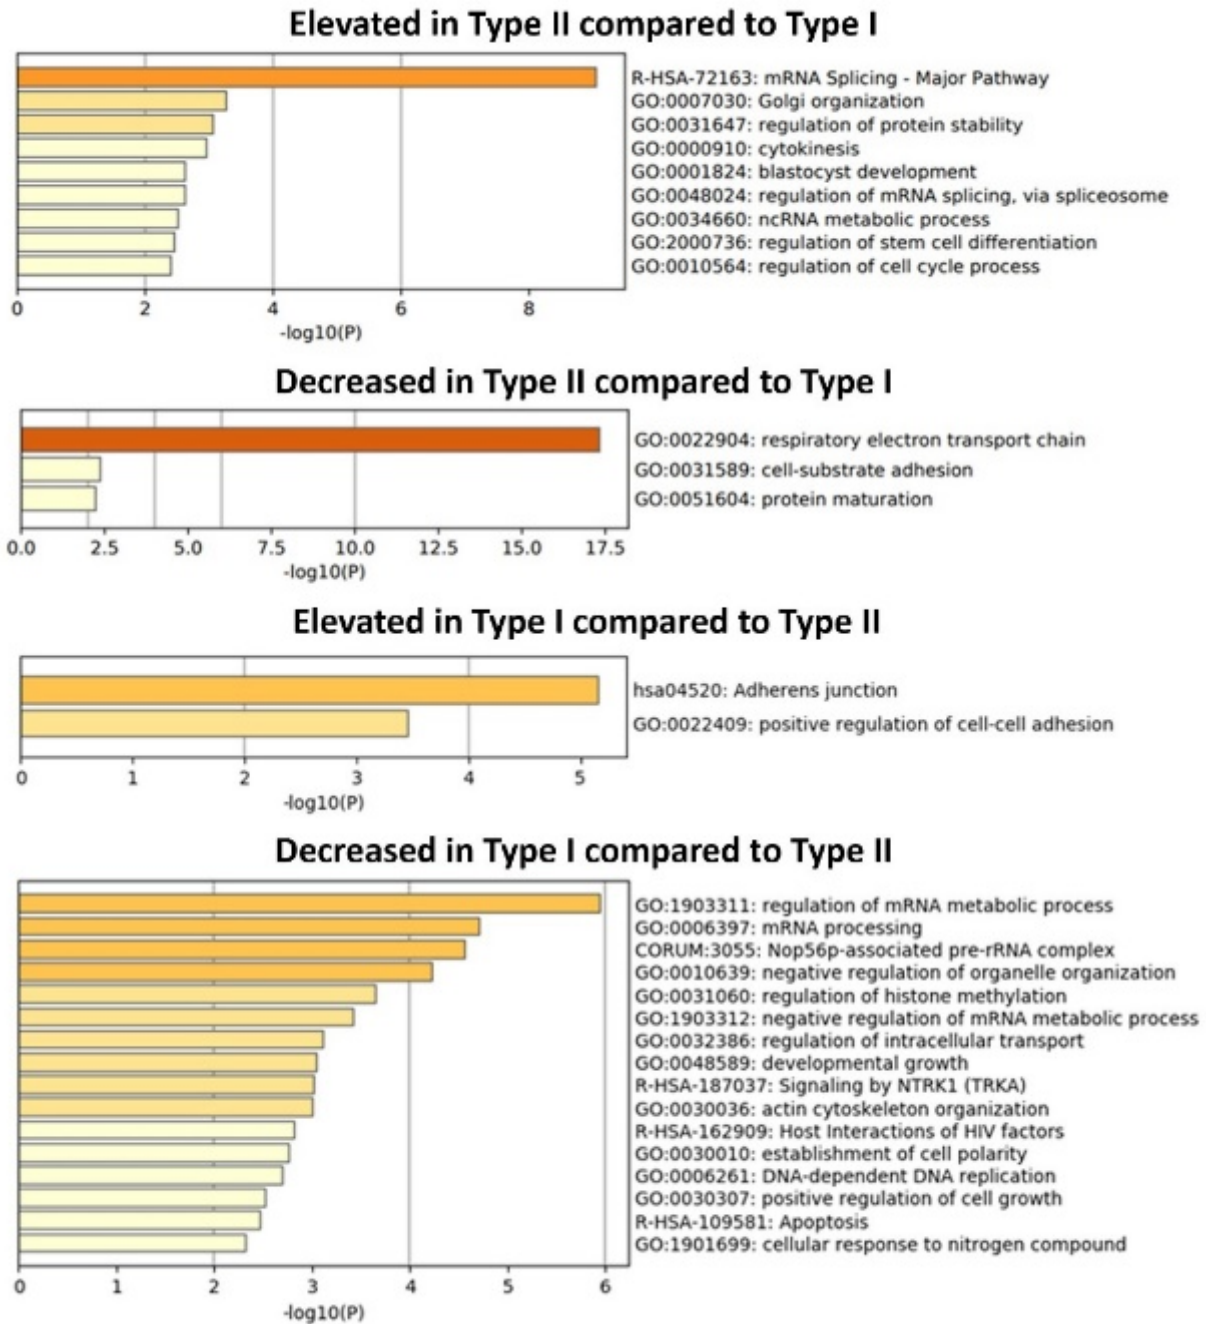

**eFigure 3.** Differential mRNA Transcript Expression Analysis of HGSOC Type I and Type II Tumors. Representative Gene Set Enrichment Analysis (GSEA) of RNA Sequencing Results Showing Pathway Changes in Primary (A) and Metastatic (B) Site Samples

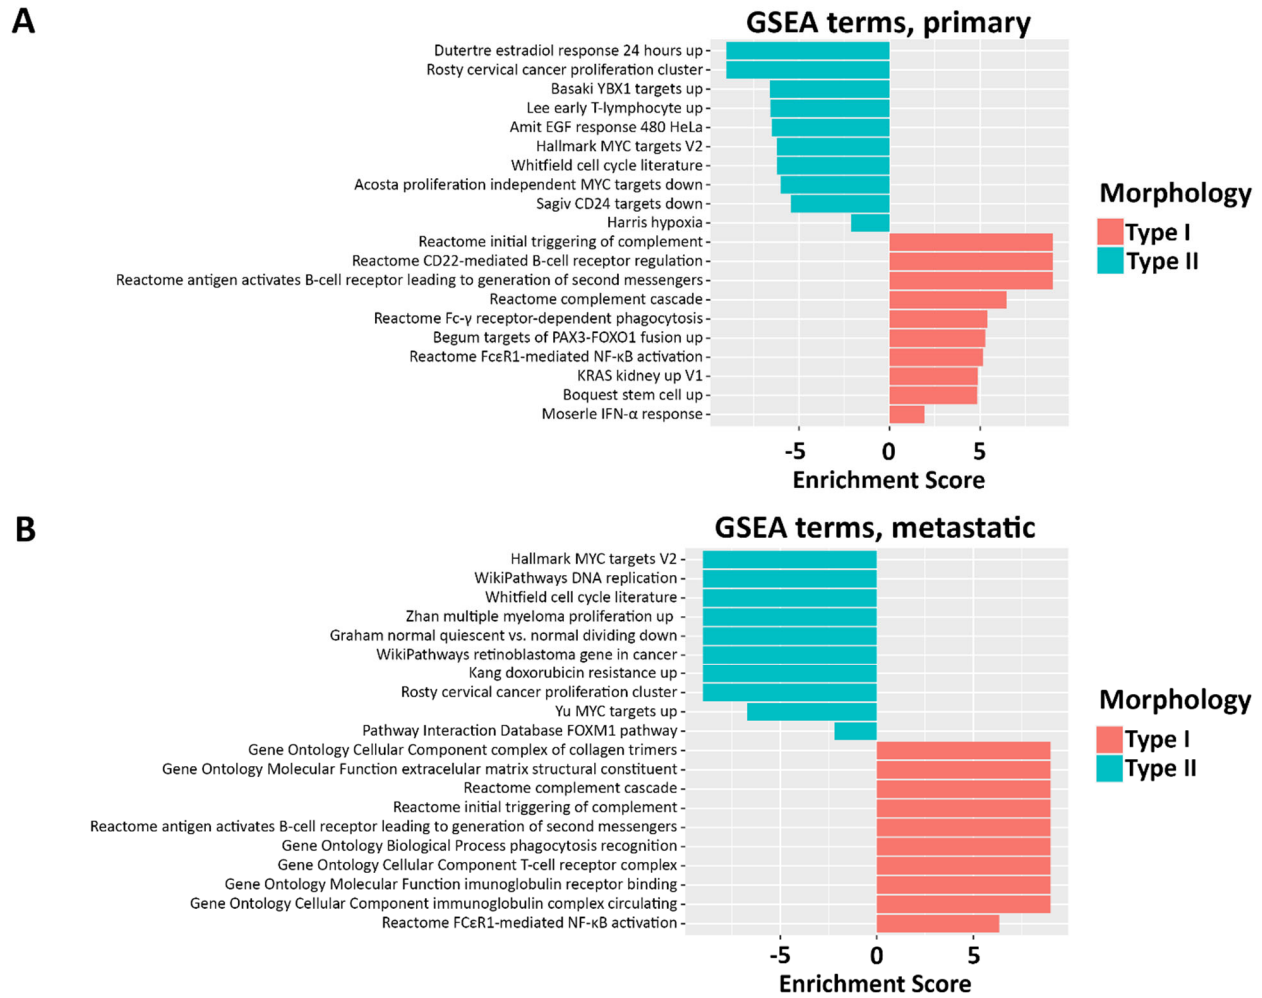

Enrichment scores are calculated based on GSEA reported p-values and false discovery rate values. Abbreviations: GSEA, Gene Set Enrichment Analysis; YBX1, Y-box binding protein 1; EGF, epidermal growth factor; MYC, avian myelocytomatosis viral proto-oncogene; CD, cluster of differentiation; Fc-gamma, fragment crystallizable-gamma; PAX3, paired box 3; FOXO1, forkhead box O1; FcepsilonR1, fragment crystallizable-epsilon receptor 1; NF-kappa B, nuclear factor-kappa B; KRAS, Kirsten rat sarcoma viral proto-oncogene; IFN-alpha, interferon-alpha; FOXM1, forkhead box M1.

**eFigure 4.** Volcano Plots from RNA Sequencing of Patient-Derived (A) Primary and (B) Metastatic High-Grade Serous Ovarian Cancer Samples of Type I vs Type II Morphologic Subtypes

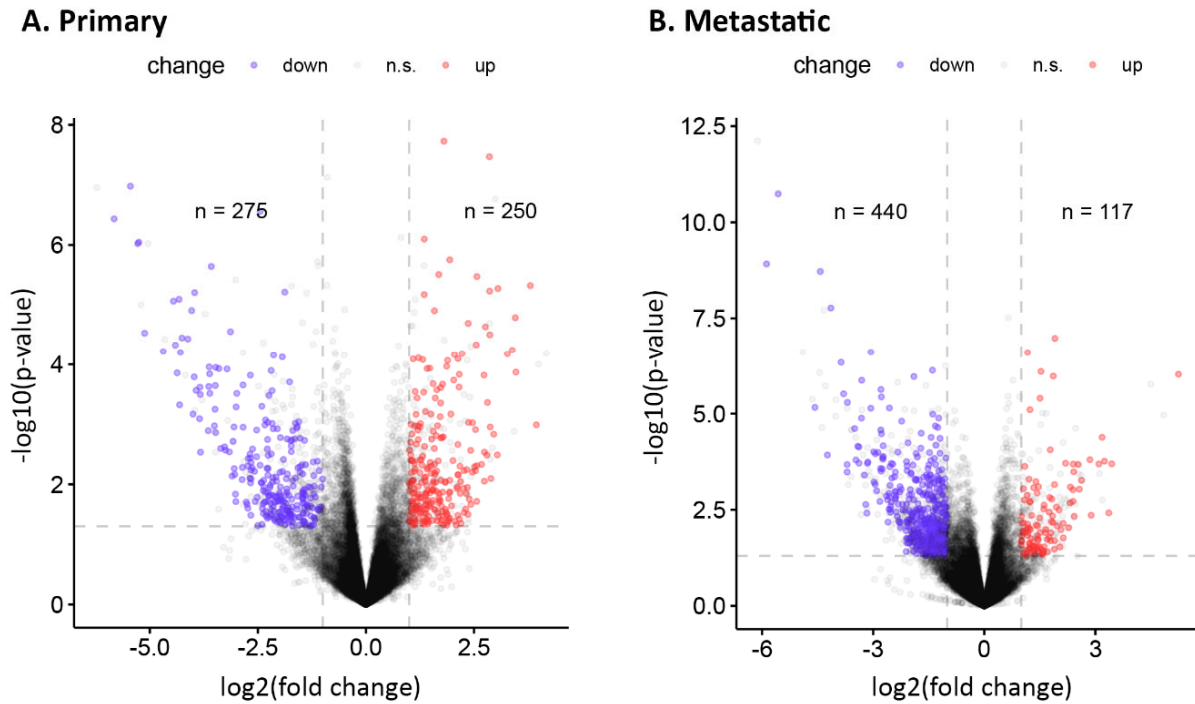

Thresholds for statistical significance, represented by the dashed lines, were  $p < 0.05$  and  $\log_2$  fold change of  $>1.0$  or  $<-1.0$ .  
Abbreviations: n.s., not significant

**eFigure 5.** (A) Concordance Between All Genes and Corresponding Proteins Profiled by Both RNA Sequencing-Based Transcriptomics and Quantitative Mass Spectroscopy-Based Proteomics. (B) Correlation of Changes in Differentially Expressed Transcript/Protein Levels Between Type I and Type II Morphologic Subtypes

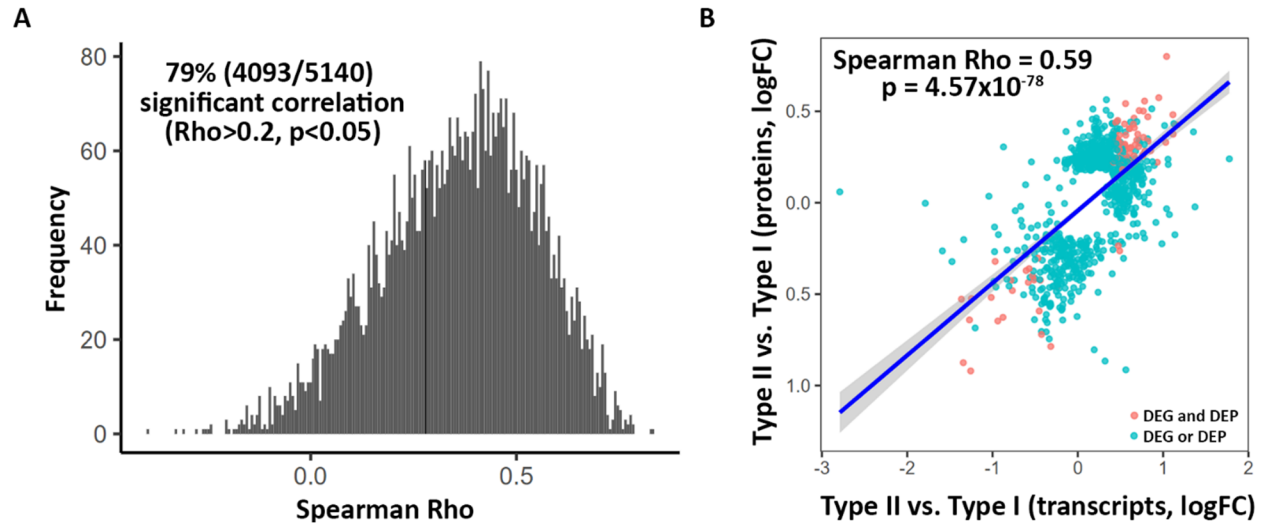

Red, genes identified by both RNA sequencing and quantitative mass spectroscopy. Blue, genes identified by either RNA sequencing or quantitative mass spectroscopy.

Abbreviations: FC, fold change; DEG, differentially expressed gene; DEP, differentially expressed protein

**eFigure 6.** Immune Population Infiltration in Predominant Type I and Type II Morphologic Subtypes in the (A) Tumor Area and (B) Total Area (Tumor/Non-Tumor)

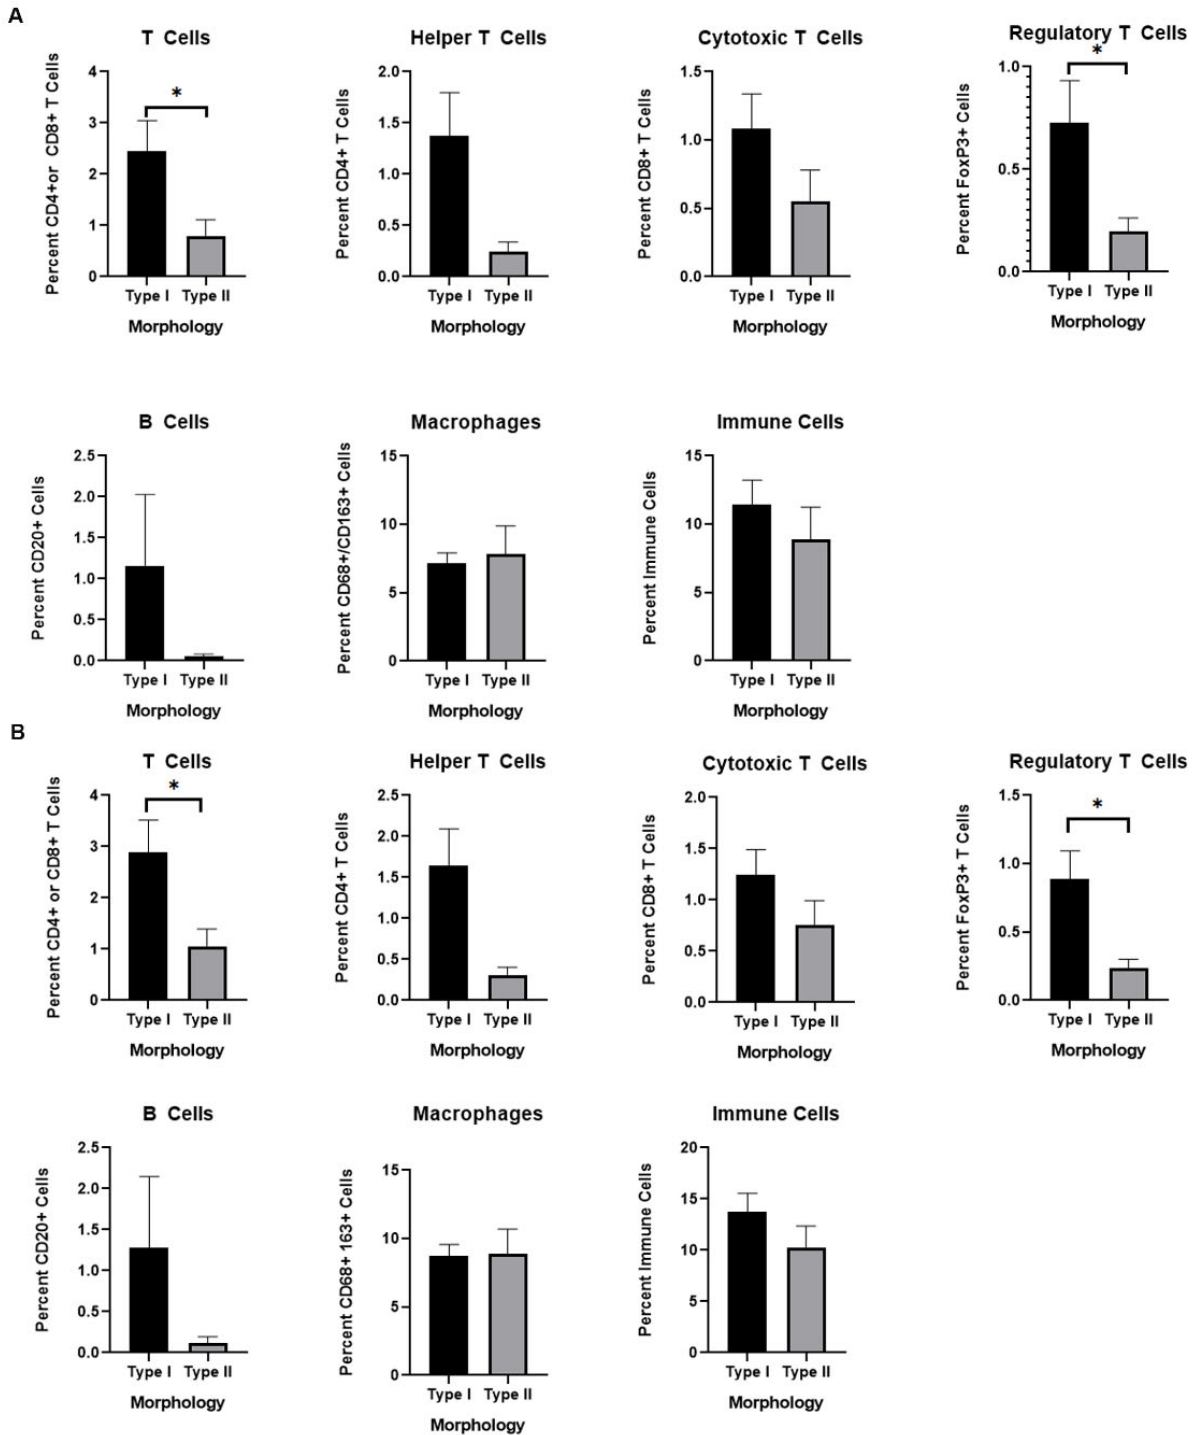

The percentages of immune populations, including all T cells, helper T cells, cytotoxic T cells, regulatory T cells, B cells, macrophages, and all immune cells, were compared. P-values were determined with either a Welch t-test or a Mann-Whitney test according to whether the data were normally distributed. Data are presented as the means  $\pm$  SEMs. \* $p < 0.05$ .

**eFigure 7.** Representative Desorption Electrospray Ionization Mass Spectra and Ion Images for Metastatic Tissues of Type I and Type II Morphologic Subtypes

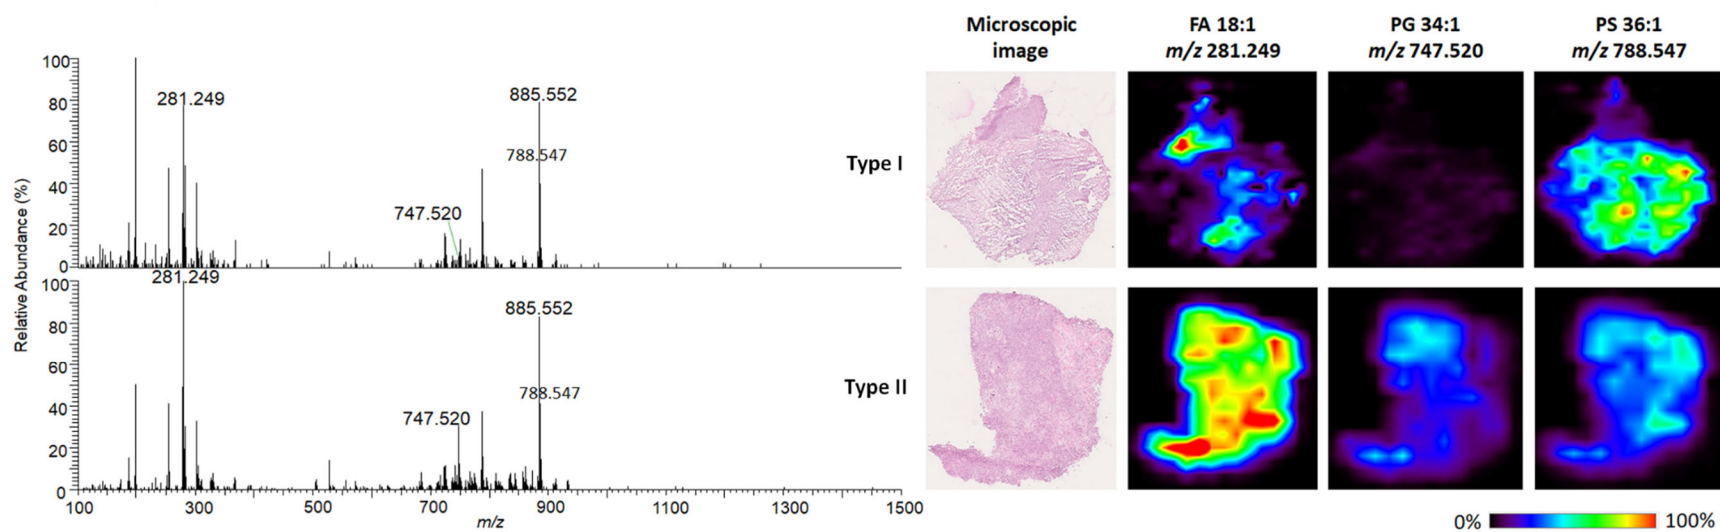

In the ion images, red areas represent the highest relative abundances (100%), and black areas represent the lowest relative abundances (0%). Lipid species are described by their numbers of fatty-acid chain carbons and double bonds.

## eReferences

1. Fleming ND, Nick AM, Coleman RL, et al. Laparoscopic Surgical Algorithm to Triage the Timing of Tumor Reductive Surgery in Advanced Ovarian Cancer. *Obstet Gynecol.* 2018;132(3):545-554.
2. Harris PA, Taylor R, Thielke R, Payne J, Gonzalez N, Conde JG. Research electronic data capture (REDCap)--a metadata-driven methodology and workflow process for providing translational research informatics support. *J Biomed Inform.* 2009;42(2):377-381.
3. Lee S, Zhao L, Rojas C, et al. Molecular Analysis of Clinically Defined Subsets of High-Grade Serous Ovarian Cancer. *Cell Rep.* 2020;31(2):107502.
4. Patro R, Duggal G, Love MI, Irizarry RA, Kingsford C. Salmon provides fast and bias-aware quantification of transcript expression. *Nat Methods.* 2017;14(4):417-419.
5. Zhang Y, Parmigiani G, Johnson WE. ComBat-seq: batch effect adjustment for RNA-seq count data. *NAR Genom Bioinform.* 2020;2(3):lqaa078.
6. Yoshihara K, Shahmoradgoli M, Martinez E, et al. Inferring tumour purity and stromal and immune cell admixture from expression data. *Nat Commun.* 2013;4:2612.
7. Subramanian A, Tamayo P, Mootha VK, et al. Gene set enrichment analysis: a knowledge-based approach for interpreting genome-wide expression profiles. *Proc Natl Acad Sci U S A.* 2005;102(43):15545-15550.
8. Mootha VK, Lindgren CM, Eriksson KF, et al. PGC-1alpha-responsive genes involved in oxidative phosphorylation are coordinately downregulated in human diabetes. *Nat Genet.* 2003;34(3):267-273.
9. Eberlin LS, Tibshirani RJ, Zhang J, et al. Molecular assessment of surgical-resection margins of gastric cancer by mass-spectrometric imaging. *Proc Natl Acad Sci U S A.* 2014;111(7):2436-2441.
10. Eberlin LS, Ferreira CR, Dill AL, Ifa DR, Cheng L, Cooks RG. Nondestructive, histologically compatible tissue imaging by desorption electrospray ionization mass spectrometry. *Chembiochem.* 2011;12(14):2129-2132.
